1 **KIF21B binds Myosin Va for Spine Entry and regulates Actin**  
2 **Dynamics to control Homeostatic Synaptic Downscaling**

3

4 **Kira V. Gromova<sup>1,2</sup>, Edda Thies<sup>1</sup>, Céline D. Dürst<sup>3</sup>, Daniele Stajano<sup>1</sup>, Michaela Schweizer<sup>4</sup>,**  
5 **Marina Mikhaylova<sup>5</sup>, Christine E. Gee<sup>2</sup>, Matthias Kneussel<sup>1,2</sup>**

6

7 <sup>1</sup>Department of Molecular Neurogenetics, Center for Molecular Neurobiology, ZMNH,  
8 University Medical Center Hamburg-Eppendorf, Hamburg, Germany

9 <sup>3</sup>Department of Synaptic Physiology, Center for Molecular Neurobiology, ZMNH, University  
10 Medical Center Hamburg-Eppendorf, Hamburg, Germany

11 <sup>4</sup>Core Facility Morphology, Center for Molecular Neurobiology, ZMNH, University Medical  
12 Center Hamburg-Eppendorf, Hamburg, Germany

13 <sup>5</sup>RG Optobiology, Institute of Biology, Humboldt Universität zu Berlin, Berlin, Germany

14

15

16 <sup>2</sup>Corresponding authors

17 [matthias.kneussel@zmnh.uni-hamburg.de](mailto:matthias.kneussel@zmnh.uni-hamburg.de)

18 [kira.gromova@zmnh.uni-hamburg.de](mailto:kira.gromova@zmnh.uni-hamburg.de)

19

20

21 **Keywords:** Neuron, Synapse, Kinesin, KIF21B, Actin, PSD-95, Dendritic  
22 Spine, GKAP, SAPAP, Homeostatic synaptic plasticity, FRAP,  
23 Myosin Va, GluA2, AMPA receptor, synaptic scaling, synaptic  
24 downscaling

25

26

27 **Abstract**

28 Homeostatic synaptic plasticity adjusts the strength of synapses to restrain neuronal activity  
29 within a physiological range. Postsynaptic GKAP controls the bidirectional synaptic scaling of  
30 AMPA receptors (AMPA receptors) however how chronic activity triggers postsynaptic protein  
31 remodeling to downscale synaptic transmission is barely understood. Here we report that the  
32 microtubule-dependent kinesin motor KIF21B interacts with GKAP and likewise enters  
33 dendritic spines in a myosin Va- and activity-dependent manner. We observed that under  
34 conditions of chronic activity KIF21B regulates actin dynamics in spines, triggers spine removal  
35 of GluA2-containing AMPA receptors, and mediates homeostatic synaptic downscaling of  
36 AMPA receptor-mediated mEPSC amplitudes. Our data highlight a myosin-kinesin interaction  
37 that enables the entry of the microtubule-dependent motor KIF21B into actin-rich spine  
38 compartments. A slow actin turnover rate might be beneficial for efficient protein removal from  
39 excitatory synapses, suggesting a functional role of KIF21B in a GKAP- and AMPA receptor-  
40 dependent mechanism, underlying homeostatic downscaling of neuronal firing.

41  
42  
43  
44  
45  
46  
47  
48  
49  
50  
51  
52  
53

## 54 Introduction

55 Homeostatic synaptic plasticity is a feedback mechanism used by neurons and neuronal  
56 networks to balance excessive excitation or inhibition by adjusting synaptic strength<sup>1</sup>. It is  
57 suggested that long-term changes in neuronal firing rates induce changes in receptor  
58 trafficking to increase or decrease the number of glutamate receptors at synapses<sup>2, 3</sup>. Since  
59 homeostatic plasticity involves the global modification of synapses, it operates over longer  
60 timescales. At postsynaptic sites, several molecules including BDNF, CaMKII, Arc, Homer1a,  
61 GKAP or Shank are known to be involved in synaptic scaling<sup>3</sup>, however, the underlying  
62 signaling pathways and molecular mechanisms still need to be investigated<sup>1</sup>. Likewise, it is  
63 unknown whether and how the postsynaptic cytoskeleton rearranges following chronic activity  
64 and, which molecular motors drive for instance AMPAR removal during homeostatic synaptic  
65 scaling.

66 The guanylate kinase-associated protein (GKAP) is a postsynaptic scaffold component that  
67 links NMDA receptor/PSD-95 to Shank/Homer complexes<sup>4</sup>. Reduction of synaptic activity  
68 induces an accumulation of GKAP at excitatory spine synapses<sup>3</sup>, a process that requires  
69 interaction with myosin Va<sup>5</sup>. In contrast, overexcitation activates the calcium-calmodulin-  
70 dependent kinase CaMKII that promotes the synaptic removal of GKAP via degradation by the  
71 ubiquitin-proteasome system<sup>3</sup>. Trafficking mechanisms in dendritic spines that rearrange  
72 receptors, cell adhesion molecules and postsynaptic density proteins require a dynamic actin  
73 cytoskeleton, endocytic recycling mechanisms, and molecular motors to adjust synaptic  
74 strength<sup>6, 7, 8</sup>. In addition to actin rearrangement, microtubules transiently polymerize into  
75 dendritic spines, for instance, to deliver synaptotagmin IV via KIF1A<sup>9, 10, 11</sup>.

76 Motor proteins of the kinesin-4 family regulate microtubule dynamics and, in addition, may  
77 mediate processive transport<sup>12, 13, 14, 15, 16</sup>. Members include KIF4/Xklp1, which reduces the rate  
78 of microtubule growth and suppresses catastrophes<sup>17</sup>, the immotile motor KIF7 which also  
79 reduces microtubule growth but promotes catastrophes<sup>18</sup>, and the two large motors KIF21A  
80 and KIF21B<sup>19</sup>. Point mutations in the *Kif21a* gene cause the dominant eye movement  
81 syndrome Congenital Fibrosis of the Extraocular Muscles type 1 (CFEOM1)<sup>20</sup>, whereas

82 KIF21B has been discussed as a risk factor in neurodevelopmental<sup>12</sup> and neurodegenerative  
83 diseases<sup>21, 22</sup>. *Kif21b* haploinsufficiency in patients leads to impaired neuronal positioning and  
84 brain malformations<sup>12</sup>. In mice, the loss of KIF21B causes aberrant dendritic arborization of  
85 hippocampal CA1 pyramidal cells<sup>23</sup>, accompanied by learning and memory deficits such as in  
86 the initial encoding of spatial information, the memory of a tone-shock association<sup>23</sup>, and  
87 reduced cognitive flexibility<sup>24</sup>.

88 In physiology, KIF21B mediates different functions in individual cell types<sup>25</sup>, including  
89 neurons<sup>12, 13, 15, 16, 23, 26</sup>. It acts as a processive motor that, in response to neuronal activity  
90 contributes to the retrograde trafficking of brain-derived neurotrophic factor (BDNF)-TrkB  
91 complexes<sup>16</sup> and participates in the cell surface delivery of GABA<sub>A</sub> receptors<sup>14</sup>. On the other  
92 hand, KIF21B regulates the dynamics of the microtubule cytoskeleton by accumulating at  
93 microtubule plus ends, thereby pausing microtubule growth<sup>13, 26</sup>. Consequently, *Kif21b*-  
94 deficient neurons are characterized by longer microtubules, than wild-type control cells<sup>23</sup>.

95 At excitatory synapses, KIF21B mediates the translocation of a Rac1 guanine nucleotide  
96 exchange factor (ELMO1) from dendritic spines to terminate Rac1 activity, a process  
97 underlying the expression of long-term depression (LTD)<sup>24</sup>. However, although KIF21B  
98 regulates proteins at dendritic spines, it has remained unclear whether the motor itself can  
99 enter spine protrusions and whether the actin cytoskeleton might be involved in KIF21B-  
100 dependent processes.

101 Here, we report that the kinesin KIF21B directly interacts with myosin Va and enters the actin-  
102 rich dendritic spine compartment in a myosin Va-dependent manner. Following chronic  
103 stimulation, we show that KIF21B functionally associates with GKAP and is a prerequisite for  
104 the dynamic rearrangement of actin filaments upon the induction of homeostatic synaptic  
105 downscaling.

106

107

108

109

## 110 **Results**

### 111 **The kinesin KIF21B enters dendritic spine protrusions**

112 The kinesin motor and microtubule pausing factor KIF21B, is a critical player in regulating spine  
113 morphology, neuronal function, and behavior<sup>16, 23, 24, 27</sup>. Whether the kinesin is restricted to  
114 neuronal dendrites or enters dendritic spine synapses has remained unknown. Using KIF21B-  
115 specific antibodies, verified by *Kif21b* knockout brain tissue, we identified the endogenous  
116 kinesin at the tips of individual F-actin-rich spine protrusions colocalized with the postsynaptic  
117 density protein PSD-95 in cultured hippocampal neurons (Figure 1A-C). About 55% of the F-  
118 actin-labeled spines were double-positive for KIF21B and PSD-95 (Figure 1D). Biochemical  
119 fractionation to enrich postsynaptic densities (PSDs), known to contain PSD-95 and GKAP<sup>4, 28</sup>  
120 but just small amounts of the presynaptic marker synaptophysin, further identified KIF21B in  
121 PSD fractions (Figure 1E). We therefore combined diaminobenzidine (DAB)-staining with  
122 immuno-electron microscopy to assess the subcellular distribution of KIF21B. Consistent with  
123 KIF21B regulating microtubule growth and microtubule-mediated transport<sup>13, 16, 23, 24, 27</sup>, the  
124 DAB-labeled motor protein decorated dendritic microtubules in wildtype, but not in *Kif21b*  
125 knockout tissue (Figure 1F, left and box 1). In addition, KIF21B was detected at the PSD of  
126 individual excitatory spine synapses in the hippocampus (Figure 1F, right and box 2). We  
127 therefore conclude that the kinesin is not restricted to dendritic microtubules, but can be located  
128 postsynaptically in an F-actin-rich compartment.

129

### 130 **Myosin Va and neuronal activity changes regulate the localization of KIF21B in spines**

131 Microtubules occasionally polymerize into dendritic spines<sup>9, 11</sup> and invading microtubules  
132 mediate KIF1A-mediated transport into spine compartments<sup>10</sup>. However, the number of spines  
133 containing microtubules is much lower<sup>9, 11</sup>, as compared to the number of spines containing  
134 KIF21B. We therefore asked whether the kinesin might enter spine protrusions independent  
135 from microtubules. Our previous proteomic screen had identified the unconventional myosin  
136 Va (MyoVa), as a potential KIF21B binding partner<sup>27</sup>, a highly abundant actin-based motor  
137 mediating AMPAR<sup>29</sup> or GKAP<sup>5</sup> trafficking. Remarkably, co-immunoprecipitation (co-IP) from

138 hippocampal lysate confirmed a specific interaction of the kinesin KIF21B with myosin Va, but  
139 not with myosin Vb. MyoVa-specific antibodies precipitated endogenous MyoVa and led to co-  
140 IP of endogenous KIF21B (Figure 2A). Vice versa, KIF21B-specific antibodies precipitated the  
141 endogenous kinesin and led to co-IP of endogenous myoVa (Figure 2B). Interestingly, this  
142 interaction was only identified in the presence of phosphatase inhibitor, suggesting a phospho-  
143 dependent regulation. To assess whether the kinesin directly binds the myosin, we employed  
144 the heterologous DupLex-A yeast two-hybrid assay. Using different deletion mutants of *Kif21b*  
145 and *MyoVa*, we identified the N-terminal region of KIF21B, containing the motor domain and  
146 parts of the stalk domain, to mediate interaction with the C-terminal region of MyoVa, harboring  
147 its coiled-coil and tail domains (Figure 2C, D). Since the tail domain of MyoVa is typically  
148 involved in cargo binding<sup>6</sup>, we asked whether chemical inhibition of MyoVa-mediated  
149 transport<sup>30</sup> altered the localization of KIF21B in F-actin/PSD-95 double positive spines. While  
150 inhibition of MyoVa over 1 h significantly reduced the number of spines containing KIF21B  
151 (Figure 2E), inhibition of myosin Vb or the use of the microtubule polymerization inhibitor  
152 nocodazole had no effect (Figure 2F), suggesting that KIF21B enters dendritic spines  
153 influenced by MyoVa but independent of MyoVb or microtubules.

154 Since KIF21B has been implicated in Rac1 regulation underlying LTD expression<sup>24</sup>, we further  
155 asked whether neuronal activity changes could in general affect the spine localization of the  
156 kinesin. To this end, we applied two independent chemical protocols to induce LTD (cLTD).  
157 Treatment of cultured hippocampal neurons with either 40 $\mu$ M NMDA for 10 minutes<sup>31</sup> or 50 $\mu$ M  
158 DHPG for 30 minutes<sup>32</sup> significantly reduced the number of KIF21B-positive spines, as  
159 compared to control conditions (Figure 2G, H). Based on our hypothesis, we further treated  
160 acute hippocampal slices with these drugs and performed co-IP experiments, using KIF21B-  
161 specific antibodies. Accordingly, both cLTD protocols significantly reduced the amount of  
162 myosin Va that coprecipitated with the kinesin (Figure 2I-K), indicating that the interaction of  
163 both motor proteins and consequent the delivery of KIF21B into dendritic spines are activity-  
164 dependent processes.

165

166 **Knockout of the *Kif21b* gene alters F-actin dynamics in dendritic spines**

167 As in former studies<sup>23, 24</sup>, the size of Dil-labeled dendritic spines in cultured hippocampal  
168 neurons (Figure 3A, B) or in area CA1 of hippocampal slices (Figure 3C, D) was significantly  
169 increased in *Kif21b* knockouts under basal conditions. Since changes in spine morphology are  
170 often attributed to the actin cytoskeleton<sup>33</sup>, we co-expressed KIF21B-GFP and mRFP-actin in  
171 COS-7 fibroblasts. Under control conditions, the kinesin appeared with a prominent localization  
172 at the periphery of these cells (Figure 3E and Supplemental Movie 1). Remarkably, in cells  
173 treated with the actin polymerization inhibitor cytochalasin D (CytoD), punctate mRFP-actin  
174 signals revealed a strong colocalization with KIF21B-GFP (Figure 3F and Supplemental Movie  
175 2) that was not apparent in control cells (Figure 3E). As CytoD increases the number of F-actin  
176 ends<sup>34</sup>, KIF21B might preferentially interact with the ends of actin filaments.

177 To address the dynamics and turnover of the synaptic actin cytoskeleton, we employed  
178 fluorescence recovery after photobleaching (FRAP), using DIV13 cultured hippocampal  
179 neurons from *Kif21b*<sup>+/+</sup> and *Kif21b*<sup>-/-</sup> mice expressing GFP-actin. Selective photobleaching of  
180 single spines in both control and knockout neurons rapidly decreased the fluorescence of GFP-  
181 actin and led to a fast recovery of the signals (Figure 3G-I). However, the GFP-actin pool in  
182 *Kif21b* knockout neurons did not recover to the same level (Figure 3G, lower images, H),  
183 suggesting that in the absence of *Kif21b* gene expression, dendritic spines contain more stable  
184 actin and a significantly reduced mobile fraction (Figure 3J). We therefore conclude that the  
185 kinesin KIF21B participates in the regulation of actin dynamics at spine synapses.

186

187 **KIF21B associates with GKAP and participates in the regulation of homeostatic synaptic**  
188 **downscaling**

189 GKAP is a postsynaptic protein connecting actin filaments with the PSD<sup>4</sup>. Since GKAP also  
190 interacts with a light chain of MyoVa<sup>5</sup>, we asked whether KIF21B and GKAP might be  
191 functionally associated. Co-IP experiments from mouse brain lysate using GKAP-specific  
192 antibodies precipitated GKAP and led to co-precipitation of KIF21B, Shank and Homer, but not  
193 the related kinesin motor KIF21A (Figure 4A and Figure S1A). Reciprocal co-IPs using KIF21B-

194 specific antibodies confirmed the GKAP-KIF2B interaction (Figure S1B). Accordingly,  
195 endogenous GKAP and KIF21B were frequently colocalized in actin-positive dendritic  
196 protrusions (Figure 4B), with about 30% of all spines depicting colocalization of both proteins.  
197 GKAP is a prominent molecular player regulating homeostatic synaptic scaling and is  
198 displaced from synaptic spines following chronic stimulation<sup>3</sup>. We therefore employed  
199 established homeostatic synaptic plasticity (HSP) protocols<sup>35, 36</sup>, to ask whether KIF21B might  
200 also participate in homeostatic regulation. Following chronic stimulation with the GABA<sub>A</sub>  
201 receptor antagonist bicuculline (BIC) or activity blockade with the sodium channel blocker  
202 tetrodotoxin (TTX) over 48 h, we analyzed the fluorescence intensity of GluA2-type AMPAR  
203 immunoreactivity at the cell surface of spines, applying a receptors surface staining protocol  
204 in the presence (+/+) or absence (-/-) of KIF21B (Figure 4C, D). Quantification of wildtype (+/+)   
205 neurons, confirmed published data, which show that BIC treatment significantly reduces  
206 surface AMPARs over 48h, whereas TTX treatment significantly increases them<sup>35, 36</sup> (Figure  
207 4C, E). In contrast, in *Kif21b* knockout (-/-) neurons, chronic BIC treatment led to opposite  
208 results, increasing spine surface AMPARs, whereas chronic TTX had no significant effect  
209 (Figure 4D, F).

210 We then recorded AMPAR-mediated miniature excitatory postsynaptic currents (mEPSCs)  
211 from CA3 neurons in DIV 23-24 hippocampal slice cultures. In this assay, BIC is known to  
212 increase network activity and, upon chronic application, to induce homeostatic downscaling of  
213 AMPA mEPSCs<sup>35, 36, 37</sup>. Accordingly, chronic BIC application significantly decreased mEPSC  
214 amplitudes in wildtype slices (Figure 4G, H, black vs. red), without changing mEPSC frequency  
215 (Figure S1C). The amplitude of mEPSCs from untreated *Kif21b* knockout neurons were  
216 significantly smaller than from control slices with no change in frequency (Figure 4G, H, blue  
217 vs. black and Figure S1C). In CA3 neurons from slices deficient in KIF21B, chronic BIC  
218 application failed to induce any reduction of mEPSC amplitude or frequency (Figure 4G, H,  
219 blue vs. purple and Figure S1C). Together, these data suggest that KIF21B, similar to its  
220 binding partner GKAP, is a critical determinant in the homeostatic regulation of synaptic  
221 AMPAR levels and participates in homeostatic synaptic downscaling.



222  
223  
224  
225  
226  
227  
228  
229  
230  
231  
232  
233  
234  
235  
236  
237  
238  
239  
240  
241  
242  
243  
244  
245  
246  
247  
248  
249

### **The regulation of homeostatic synaptic downscaling though GKAP requires KIF21B**

In addition to AMPARs, homeostatic downscaling decreases the levels of other postsynaptic proteins<sup>37</sup>. In part, these decreases are mediated through ubiquitination and the subsequent proteasomal degradation of GKAP<sup>3</sup>. In order to check whether GKAP leaves dendritic spines under the conditions of our study, we quantified fluorescence intensity of immunostained endogenous GKAP and F-actin, following 48h of BIC. Consistent with the literature<sup>3</sup>, GKAP significantly decreased at actin-positive spine protrusions, as compared to control conditions (Figure 5A, B). Notably, the GKAP binding partner KIF21B also was reduced significantly at spines after chronic BIC (Figure 5C, D), supporting our hypothesis that the kinesin might participate in mechanisms of homeostatic synaptic downscaling. To assess whether the synaptic removal of GKAP might be KIF21B-dependent, we performed this assay in the absence of *Kif21b* gene expression. Whereas chronic BIC treatment significantly reduced GKAP from actin-positive protrusions in wildtype neurons, expressing KIF21B (Figure 5E, F), the effect was abolished in *Kif21b* knockout neurons (Figure 5F, G). Thus, the functional role of GKAP in the regulation of synaptic downscaling<sup>3</sup> requires the kinesin KIF21B.

Finally, we aimed to assess whether the induction of synaptic downscaling altered the dynamics of the actin cytoskeleton. To this end, we applied FRAP experiments with GFP-actin following chronic BIC treatment over 48h. In wildtype (+/+) neurons, F-actin turnover rates were significantly slower in the presence of BIC (Figure 5H and Figure S1D) characterized by a significantly longer half-time recovery (Figure 5J) and a tendency pointing to a reduced mobile fraction (Figure 5K). Remarkably, in the absence of *Kif21b* gene expression (knockout -/- neurons), this change in actin dynamics was not detectable (Figure 5I-K and Figure S1D), indicating that the kinesin is a prerequisite for the dynamic rearrangement of actin filaments upon the induction of synaptic downscaling.

## 250 Discussion

251 This study reports that the kinesin motor protein KIF21B binds to the postsynaptic scaffold  
252 protein GKAP (Figures 4 and S1), a critical regulator of homeostatic synaptic scaling<sup>3</sup>. Like  
253 GKAP<sup>3,5</sup>, KIF21B enters dendritic spines in a myosin Va-dependent manner (Figures 1 and 2).  
254 Under conditions of chronic activity that induce homeostatic synaptic downscaling (BIC over  
255 48h), the kinesin stabilizes the actin cytoskeleton and reduces polymerization of F-actin in  
256 spines (Figure 5 and S1). This process seems to be critical for synaptic protein removal  
257 following the induction of homeostatic plasticity, since KIF21B is required for the removal of  
258 GKAP and GluA2-containing AMPARs from spines and for homeostatic synaptic downscaling  
259 of AMPAR-mediated mEPSC amplitudes (Figure 4 and 5). Our data connect a kinesin motor  
260 and microtubule pausing factor with synaptic homeostasis. They further demonstrate that a  
261 kinesin cooperates with a myosin and participates in the dynamic regulation of the actin  
262 cytoskeleton in dendritic spines.

263  
264 So far, only a limited number of molecules and mechanisms have been shown to regulate  
265 homeostatic synaptic plasticity (HSP). At glutamatergic synapses, HSP regulation includes the  
266 delivery and removal of AMPA receptors to the postsynaptic plasma membrane<sup>38,39</sup>. In addition  
267 to AMPA receptor diffusion within the plane of the plasma membrane<sup>40,41</sup>, AMPA receptor  
268 turnover requires endocytosis, motor proteins and a highly regulated actin cytoskeleton in  
269 spines<sup>29,42,43</sup>. Whereas, AMPA receptors undergo endocytic recycling and eventually reinsert  
270 into the cell surface membrane<sup>44,45</sup>, other postsynaptic factors leave the synapse via  
271 ubiquitination and subsequent proteasomal degradation. For instance, the postsynaptic  
272 density protein GKAP undergoes activity-dependent ubiquitination, which can be induced  
273 through the phosphorylation of CaMKII<sup>3</sup>. Notably, previous studies revealed GKAP as well as  
274 the kinesin KIF21B as interactors of the ubiquitin ligase TRIM3<sup>46,47</sup>, suggesting that the  
275 ubiquitin-proteasome pathway might be involved in the processes described in this study.

276

277 Different studies reported physical binding<sup>48, 49, 50</sup> or functional interactions<sup>51</sup> between kinesin  
278 and myosin motor proteins. Dendritic spines mainly contain actin filaments<sup>8</sup> and myosin  
279 motors<sup>6, 29, 42</sup>, however depending on neuronal activity, some dynamic microtubules  
280 occasionally polymerize into dendritic spines<sup>9, 11</sup> and regulate cargo transport through kinesin  
281 motors, such as the KIF1A-dependent delivery of synaptotagmin IV<sup>10</sup>. Also, KIF5 participates  
282 in the synaptic removal of an AMPAR-protrudin complex from spines, following LTD  
283 expression<sup>52</sup>. In contrast to microtubule-dependent spine entry of kinesins, our study reports a  
284 novel association of KIF21B with myosin Va that points to KIF21B spine entry in a myosin Va-  
285 dependent manner. Since the number of KIF21B-positive spines exceeds the number of  
286 microtubule-positive spines by an order of magnitude<sup>9, 11</sup>, KIF21B might undergo piggyback  
287 transport by myosin Va. Consistent with this view, a chemical inhibitor of myosin Va interferes  
288 with the spine localization of KIF21B (Figure 2E).

289  
290 Our finding that the kinesin KIF21B regulates the fluorescence recovery of actin after  
291 photobleaching was unexpected and might be an indirect effect involving other proteins.  
292 However, a kinesin from plants was shown to bind to actin filaments<sup>53</sup> and the kinesin-like  
293 proteins KAC1/2 regulate actin dynamics underlying chloroplast light avoidance in plants<sup>54</sup>. In  
294 dendritic spines, actin filaments connect to the PSD-95-positive postsynaptic density through  
295 SynGAP, GKAP, Shank and cortactin, with GKAP being in an intermediate position<sup>4</sup>. Following  
296 HSP-triggered removal of GKAP from postsynaptic sites, the physical connection between  
297 actin filaments and the postsynaptic density might be weakened. Previous studies reported  
298 that the induction of synaptic plasticity causes rearrangement of actin filaments and the  
299 regulation of actin dynamics in spines<sup>8, 55</sup>. Our finding that KIF21B regulates spine actin stability  
300 following HSP induction could suggest that stable actin filaments and slower actin dynamics  
301 are a prerequisite for the efficient removal of spine proteins under HSP conditions.

302  
303 KIF21B is involved in the regulation of critical mechanisms underlying synaptic plasticity,  
304 learning and memory<sup>16, 23</sup>. Previous data further reported that LTD-causing stimuli induce the

305 dynamic association of KIF21B with the Rac1GEF subunit engulfment and cell motility protein  
306 1 (ELMO1), leading to ELMO1 translocation out of dendritic spines and its sequestration into  
307 endosomes. Despite these functional knock-down and knockout studies, KIF21B was so far  
308 not detected at the PSD of spine protrusions. The present study is consistent with a synaptic  
309 role of the kinesin and has revealed that KIF21B not only regulates Hebbian, but also  
310 homeostatic processes at glutamatergic synapses. Future studies will have to clarify whether  
311 these different regulatory modes underlie overlapping molecular pathways and whether they  
312 require KIF21B as cargo transporter or pausing factor of microtubule growth.

313

314 Finally, the kinesin KIF21B is highly upregulated in neurodegenerative disease (NDD) including  
315 multiple sclerosis (MS) and Alzheimer's disease (AD)<sup>22</sup>. Under these conditions, a high  
316 prevalence of epileptiform activity emerges as a common pathophysiological hallmark<sup>56</sup>.  
317 Upregulation of *Kif21b* gene expression was most prominent in younger AD patients up to 62  
318 years of age, suggesting that KIF21B might be beneficial at early stages when  
319 neurodegeneration is still limited. However so far, no functional role of KIF21B could be related  
320 to NDDs. Our observation that KIF21B participates in the homeostatic synaptic downscaling  
321 of chronically elevated neuronal activity, could be a potential explanation for the upregulation  
322 of KIF21B in NDD. Whether this effect is an attempt of neurons to compensate for  
323 hyperexcitability in disease, requires further investigation. Nevertheless, our study provides a  
324 starting point to address these questions.

325

326 In summary, the presently available data about KIF21B in neurons reveal that the motor acts  
327 at a critical position underlying long-term depression<sup>24</sup> and homeostatic synaptic downscaling  
328 at synaptic sites. To connect these physiological functions with synaptopathy will become a  
329 future challenge.

330

331

332

## 333 **Methods**

334 **Antibodies and DNA Constructs.** The following antibodies were obtained from commercial  
335 sources. Rabbit anti-KIF21B (1:1,000; Sigma-Aldrich, Taufkirchen, Germany), Mouse anti-  
336 Homer1 (1:1,000; Synaptic Systems, Göttingen, Germany), mouse anti-GluA2 extracellular  
337 (1:1,000; Millipore, Darmstadt, Germany), rabbit anti-MyoVa (1:1,000; Sigma-Aldrich,  
338 Taufkirchen, Germany), rabbit anti-MyoVI (1:1,000; Sigma-Aldrich, Taufkirchen, Germany),  
339 mouse anti-PSD95 (1:100; Thermo Fisher Scientific, Dreieich, Germany), goat anti-Shank1-3  
340 (1:1,000; Abcam, Cambridge, UK), guinea pig anti-Synaptophysin (1:1,000; Synaptic Systems,  
341 Göttingen, Germany), rabbit anti-KIF21A (1:1,000; Dianova, Hamburg, Germany). Cy2, Cy3,  
342 Cy5, DyeLight conjugated donkey anti-rabbit, anti-mouse or anti-goat (1:1,000; Dianova,  
343 Hamburg, Germany), peroxidase-conjugated donkey anti-rabbit, anti-mouse, anti-goat  
344 (1:15,000; Dianova, Hamburg, Germany). The following constructs have been previously  
345 described: KIF21B-EGFP<sup>13</sup>; mRFP/EGFP-actin (Addgene, Cambridge, MA).

346

347 **Animals.** Mice were housed and bred at the animal facility of the University Medical Center  
348 Hamburg-Eppendorf. All procedures were performed in compliance with German law and  
349 according to the guidelines of Directive 2010/63/EU. Protocols were approved by the “Behörde  
350 für Justiz und Verbraucherschutz, Lebensmittel und Veterinärwesen Hamburg“.

351

352 **Immunoprecipitation.** All steps were carried out at 4°C. 30 µl “Dynabeads Protein G” (Life  
353 Technologies, Darmstadt, Germany) were washed in PBS and incubated with 2-5 µg of specific  
354 antibody or control IgG for 30-60 min. After washing in PBS and IM-Ac-buffer (20 mM HEPES,  
355 100 mM K-Acetate, 40 mM KCl, 5 mM EGTA, 5 mM MgCl<sub>2</sub>, 1% Triton-X-100, 1x Complete  
356 Protease Inhibitor Cocktail (Roche, Mannheim, Germany), 1mM PMSF, 5 mM DTT and 2 mM  
357 ATP; pH 7.2) and 1x Phosphatase Inhibitor Cocktail (Roche, Mannheim, Germany), antibody-  
358 coupled beads were incubated for 2-4h or other night with mouse brain lysate. Beads were  
359 then extensively washed with IM-Ac-buffer, boiled in SDS sample buffer and analysed by

360 western blotting. Brain lysates were obtained by differential centrifugation from whole mouse  
361 brains at postnatal day P23 or from isolated hippocampus P365, as described <sup>57</sup>.

362

363 **Western blot analysis.** Samples were incubated for 5 min at 95°C in SDS loading buffer and  
364 subjected to sodium dodecyl sulphate-polyacrylamide gel electrophoresis (SDS-PAGE).  
365 Proteins were transferred to polyvinylidene difluoride (PVDF) membranes using a semi-dry  
366 blotting system. Membranes were blocked in 3% BSA (bovine serum albumin) prior to  
367 overnight incubation with primary antibodies at 4°C. Membranes were then washed and  
368 incubated with secondary antibodies coupled to horseradish peroxidase (HRP).  
369 Immunoreactive bands were visualized using the chemiluminescence detection system  
370 (INTAS Chemo Cam 3.2, Göttingen, Germany). Optical densities of respective bands were  
371 analysed using the Image J software (NIH, Bethesda, MD).

372

373 **Primary hippocampal cultures, transfection, immunocytochemistry.** Primary hippocampal  
374 neurons were prepared from embryonic day 16 (E16). Briefly, 12 mm coverslips were coated  
375 with poly-L-lysine (5 µg/ml in PBS). 60,000 cells were seeded per coverslip in Lonza PNGM  
376 medium (Thermo Fisher Scientific, Dreieich, Germany). Neurons were cultured for 14-24 days  
377 *in vitro* (DIV) and were transfected using a calcium phosphate precipitation protocol. Briefly,  
378 per 22 mm coverslip, 2 µg of DNA (250 mM CaCl<sub>2</sub> in 25 µl) was mixed with 25 µl of 2x HBS  
379 (42 mM HEPES, 10 mM KCl, 12 mM dextrose, 274 mM NaCl, 1.5 mM Na<sub>2</sub>PO<sub>4</sub>; pH 7.0) and  
380 added to the culture medium. Formed precipitates were carefully removed after 1 h. 600 µl of  
381 Lonza PNGM culture medium was added. For immunocytochemistry neurons were fixed for 7-10  
382 min with 4% formaldehyde/4% sucrose in PBS at room temperature. After fixation, cells were  
383 washed three times in PBS and incubated for 1 h at room temperature with primary antibodies  
384 diluted in goat serum dilution buffer (GDB) (10% DS, 0,23% Triton X-100, in PBS). Neurons  
385 were then washed three times in PBS (5 min each), following incubation with Cy-conjugated  
386 secondary antibodies in GDB buffer for 1 h at room temperature. After three additional washes  
387 in PBS for 30 min each, slides were mounted using Vectashield mounting medium (Thermo

388 Fisher Scientific, Dreieich, Germany). Images were acquired using a Nikon microscope  
389 equipped with the following components: Spinning Disk (Yokogawa) (Visitron Systems,  
390 Puchheim, Germany), solid state lasers (488, 561, 647 and 405), objectives (60x and 100x),  
391 two EM-CCD cameras (Hamamatsu Photonics 512/1024, Herrsching am Ammersee,  
392 Germany).

393

394 **Yeast two-hybrid-system.** To map interaction domains of KIF21B and myosin Va, the lacZ-  
395 reporter gene assay of the DupLex-A yeast-two-hybrid system (Origene, Rockville, MD) was  
396 used. KIF21B-prey constructs encoding different domains were used in combination with bait  
397 constructs, encoding myosin Va domains.

398

399 **HSP induction and surface staining.** At DIV 18-20 cultures were treated for 48 h with 50 $\mu$ M  
400 Bicuculline or 1 $\mu$ M TTX (Bio-techne GmbH, Wiesbaden, Germany). For surface labeling a  
401 GluA2 antibody was used, as described above. Cells were fixed for 4 minutes in 4% PFA. After  
402 washing 3 times with 1X PBS the primary antibody was added and incubated for 3 h at room  
403 temperature. After washing, cells were permeabilized with 0.1% Triton for 10 minutes.  
404 Phalloidin and the secondary antibody were added for 1 h at room temperature. Coverslips  
405 were mounted with Polymount (Polysciences Europe GmbH, Eppelheim, Germany) and  
406 imaged with a Nikon spinning disc confocal microscope (Visitron Systems, Puchheim,  
407 Germany).

408

409 **COS7 cell culture.** Cells were cultured in Dulbecco's modified Eagle's medium (DMEM),  
410 (Thermo Fisher Scientific, Dreieich, Germany), supplemented with 10% fetal calf serum (FCS),  
411 100  $\mu$ g/ml streptomycin, and 100 units/ml penicillin. Cells were cultured at 37°C in a humidified  
412 incubator with 5% CO<sub>2</sub> and seeded at 60,000 cells per 22 mm coverslip prior to transfection  
413 with Lipofectamine® 2000 (Thermo Fisher Scientific, Dreieich, Germany). Cells were used for  
414 time-lapse imaging experiments.

415

416 **Time-lapse imaging.** COS7 cells or hippocampal neurons were prepared as described above.  
417 Coverslips were placed in an Attofluor® Cell chamber for microscopy (Thermo Fisher,  
418 Dreieich, Germany). Images were acquired using a Nikon microscope equipped with the  
419 following components: Spinning Disk (Yokogawa) (Visitron Systems, Puchheim, Germany),  
420 solid state lasers (488, 561, 647 and 405), objectives (60x and 100x), two EM-CCD cameras  
421 (Hamamatsu Photonics 512/1024, Herrsching am Ammersee, Germany) containing optical  
422 image splitters for simultaneous dual image acquisition, and an incubation chamber for  
423 controlled cell culture environment (5% CO<sub>2</sub> at 37°C). Images were captured at 1-3 second  
424 intervals for 50-200 seconds.

425  
426 **Fluorescence recovery after photobleaching (FRAP).** Cultured hippocampal neurons from  
427 *Kif21b*<sup>+/+</sup> and *Kif21b*<sup>-/-</sup> mice were transfected at DIV 12 with GFP-actin plasmids and imaged  
428 the following day. Only spines with distinct heads were selected for analysis. Image acquisition  
429 was performed using a Nikon spinning disc confocal microscope (Visitron, Puchheim,  
430 Germany) equipped with 60x objectives, 405/488 nm lasers, and an incubation chamber (5%  
431 CO<sub>2</sub>, 37°C). Each spine was imaged five times (1s per frame) using 488 nm excitation before  
432 photobleaching. On the sixth frame, photobleaching (total bleaching time of 1 s) was induced  
433 with ~2.2 mW of laser power (405 nm laser). Imaging resumed immediately after bleaching  
434 and continued every second for 300 consecutive seconds. The recovery of the bleached  
435 fluorescence signal for each frame was normalized to background levels and pre-bleach  
436 signals. The recovery curves were fitted to an exponential equation to extract various  
437 measures, including the relative size of the stable and dynamic pools as well as the recovery  
438 half-time ( $t_{1/2}$ ).

439  
440 **Preparation of synaptosomes.** Mice from both genotypes were euthanized, and brains were  
441 immediately extracted. Hippocampi were isolated and stored in 10 volumes of sucrose buffer  
442 1 (320mM sucrose, 1mM NaHCO<sub>3</sub>, 1mM MgCl<sub>2</sub>, 0.5mM CaCl<sub>2</sub>, 1μM PMSF) containing  
443 protease inhibitor cocktail (Roche, Mannheim, Germany). Tissues were homogenized for 10



444 strokes using a motor-driven 2 ml Potter-Elvehjem homogenizer fitted with a Teflon pestle. All  
445 procedures were conducted at 4°C with pre-cooled solutions. Homogenates were centrifuged  
446 at 1,000 x g for 10 min. Resulting supernatants were stored on ice while pellets were re-  
447 homogenized once more, and centrifuged at 700 x g for 10 min. Resulting supernatants were  
448 combined with the first supernatant and centrifuged at 13,800 x g for 10 min. Pellets were  
449 homogenized in 500 µl sucrose buffer 2 (320 mM sucrose, 1 mM NaHCO<sub>3</sub>). Homogenates  
450 were overlaid with 2 ml of 1.4 M sucrose, 1 mM NaHCO<sub>3</sub>, and 2 ml of 1.0 M sucrose, 1 mM  
451 NaHCO<sub>3</sub>, followed by gradient centrifugation at 82,500 x g for 1.5 h. Bands at the 1.4 M and 1  
452 M interface were collected, diluted in 4 volumes sucrose buffer 2, and pelleted by centrifugation  
453 at 28,000 x g for 20 min. The resulting pellets containing synaptosomes were re-suspended in  
454 100µl sucrose buffer 2. For the preparation of PSDs, an equal volume of 1% (v/v) Triton X-  
455 100, 320 mM sucrose, 12 mM Tris-HCl pH 8.0 was added for 15 min with occasional mixing.  
456 Samples were centrifuged at 70,000 x g for 1 h. Resulting supernatant were kept as PSD  
457 supernatant. The resulting pellet containing postsynaptic densities were resuspended in 40  
458 mM Tris-HCl pH 8.0. Sample protein concentrations were determined with a BCA-assay  
459 (Pierce Biotechnology, Rockford, IL). Equal amounts of protein samples (10 µg of PSD  
460 supernatant and 5 µg of PSD) were applied on 4-15% gradient sodium dodecyl sulfate-  
461 polyacrylamide (SDS) gels.

462

463 **Electrophysiology.** *Slice culture preparation:* Blind to genotype, organotypic hippocampal  
464 slices were prepared from WT and KO P5 mice as described previously<sup>58</sup>. Briefly, dissected  
465 hippocampi were cut into 400 µm pieces with a tissue chopper and placed on a porous  
466 membrane (2 slices per membrane, Millicell CM, Millipore) in six-well plates. Cultures were  
467 maintained at 37°C, 5% CO<sub>2</sub> in a medium containing (for 500 ml): 394 ml Minimal Essential  
468 Medium (Sigma M7278), 100 ml heat inactivated donor horse serum (H1138 Sigma), 1 mM L-  
469 glutamine (Gibco 25030-024), 0.01 mg ml<sup>-1</sup> insulin (Sigma I6634), 1.45 ml 5 M NaCl (S5150  
470 Sigma), 2 mM MgSO<sub>4</sub> (Fluka 63126), 1.44 mM CaCl<sub>2</sub> (Fluka 21114), 0.00125% ascorbic acid  
471 (Fluka 11140), 13 mM D-glucose (Fluka 49152). No antibiotics were added to the culture

472 medium. The medium was partially exchanged (60-70%) twice weekly. 36-48 hours before the  
473 electrophysiology recordings, membranes were placed into 35 mm culture dishes with fresh  
474 medium or fresh medium containing 40  $\mu$ M bicuculline methiodide (Alamone labs, Jerusalem,  
475 Israel). The dishes were coded so that the experimenters were blind to genotype and treatment  
476 during the recordings and analysis.

477 Hippocampal slice cultures were placed at DIV 23-24 in the recording chamber and superfused  
478 with a HEPES-buffered solution containing (in mM): NaCl (145 mM, Sigma; S5886-500G),  
479 HEPES (10 mM, Sigma; H4034-100G), D-glucose (25 mM, Sigma; G7528-250G), KCl (2.5  
480 mM, Fluka; 60121-1L),  $MgCl_2$  (1 mM, Fluka; 63020-1L),  $CaCl_2$  (2 mM, Honeywell; 21114-1L),  
481 pH 7.4, 318 mOsm  $kg^{-1}$ . Patch pipettes with a tip resistance of 3 to 4  $M\Omega$  were filled with (in  
482 mM): K-gluconate (135 mM, Sigma; G4500-100G), EGTA (0.2 mM, Sigma-Aldrich; E0396-  
483 10G), HEPES (10 mM, Sigma; H4034-100G),  $MgCl_2$  (4 mM, Fluka; 63020-1L),  $Na_2$ -ATP (4  
484 mM, Aldrich; A26209-1G), Na-GTP (0.4 mM, Sigma; G8877-100MG),  $Na_2$ -phosphocreatine  
485 (10 mM, Sigma; P7936-1G), ascorbate (3 mM, Sigma; A5960-100G), pH 7.2, 295 mOsm  $kg^{-1}$ .  
486 TTX 1  $\mu$ M, CPPene 1  $\mu$ M, and picrotoxin 100  $\mu$ M were added to the extracellular solution to  
487 isolate AMPA receptor-mediated miniature excitatory postsynaptic currents. Experiments were  
488 performed at  $33^\circ C \pm 1^\circ C$ . Whole-cell patch-clamp recordings from CA3 pyramidal neurons  
489 were performed either using an Axopatch 200B (Axon Instruments, Inc.) amplifier or a  
490 Multiclamp 700B amplifier (Molecular Devices), both under the control of Ephys software  
491 written in Matlab (Suter et al., 2010). CA3 neurons were patched and held at  $-65$  mV in the  
492 whole-cell voltage-clamp configuration (no liquid junction potential correction, LJP =  $-14.5$  mV).  
493 Miniature EPSCs were recorded starting 5 min after break-in for 5 minutes. Series resistance,  
494 membrane resistance, and capacitance were calculated from  $-5$  mV voltage steps (200 ms,  
495 every 100 s) from the holding potential of  $-65$  mV. Series resistance was less than 20  $M\Omega$ ,  
496 and recordings were discontinued if resistance changed more than 30%. The analog signals  
497 were filtered at 2 kHz and digitized at 10 kHz. *Analysis*: recordings were imported into Clampfit  
498 10, high-pass filtered at 1 Hz, and events were detected using threshold detection ( $-12$  pA).  
499 Statistical analysis was performed using GraphPad Prism.

500  
501  
502  
503  
504  
505  
506  
507  
508  
509  
510  
511  
512  
513  
514  
515  
516  
517  
518  
519  
520  
521  
522  
523  
524  
525  
526  
527

**Diolistic (Dil) dye labeling in hippocampal slices.** Mice were perfused with 4% PFA and 0.1% Glutaraldehyde in PBS. Hippocampi were sectioned into 300  $\mu\text{m}$  slices, which were maintained in fixative until ready for use. *Preparation of bullets:* Diolistic neuronal staining was performed with 1.6  $\mu\text{M}$  Dil-coated gold bullets were prepared by dissolving 13.5 mg of lipophilic Dil dye in 450  $\mu\text{l}$  of methylene chloride (final concentration = 3 mg/100  $\mu\text{l}$ ). 100  $\mu\text{l}$  Dil solution was dropped on 1 g of gold particles that were spread on a glass slide. After the methylene chloride had evaporated, the gold particles were scraped and diced with a razor blade, transferred to a tube containing 200 $\mu\text{l}$  water, and sonicated in a water bath for 10-30 min at room temperature. Meanwhile, TEZFEL tubing was coated with 10 mg/ml polyvinylpyrrolidone (PVP) solution. Beads were added to the tubing via a syringe and rotated until all liquid had evaporated. The tubing was then cut into 13 mm-long sections and placed into a vial until use. *Shooting:* Dil-labeled bullets were shot through a 3.0  $\mu\text{m}$  mesh 1 using a Helios Gene Gun system (Biorad, München, Germany) at 130 psi helium gas pressure.

**Image processing, spine head size.** After Diolistic dye labeling, non-overlapping labeled neurons from the CA1-hippocampal region were imaged with a Nikon spinning disc confocal microscope (Visitron, Puchheim, Germany) using a 20x objective. Z-stack images were captured every 2  $\mu\text{m}$  for subsequent three-dimensional reconstruction of the entire dendritic tree. In order to analyze spines, stacks of images with 1  $\mu\text{m}$  step size were captured with a 60x objective. Secondary branches from basal and apical dendrites were selected as regions of interest from the original image stack using Imaris software (Bitplane, AG, Zurich, Switzerland). Using the filament tracer plugin, dendritic length, spine number and geometry of the spines were assessed. Values obtained for dendritic length, spine length, spine minimum diameter and spine terminal point diameter were used for further analyses. Spines with necks longer than 0.5  $\mu\text{m}$  and head size of at least 0.13  $\mu\text{m}^2$  were classified as mushroom spines. Only these spines were used for quantification of spine head size.

528 **Statistics.** Statistical analyses were performed using SigmaPlot 13.0 (Systat Software Inc.,  
529 Düsseldorf, Germany) and GraphPad Prism (GraphPad Inc., Bangalore, India).

530

531

## 532 **Author Contributions**

533 KVG, MM and MK designed the study. KVG, ET, CEG, MS, DS performed experiments. All  
534 authors analyzed data. KVG and MK wrote the manuscript with help of MM. All authors read  
535 and commented on the manuscript.

536

537

## 538 **Acknowledgements**

539 Supported by: Deutsche Forschungsgemeinschaft (DFG) grant KN556/11-2 (FOR 2419);  
540 KN556/16-1 and the Landesforschungsförderung Hamburg grant LFF-FV76 to M.K.

541

542

543

544

545

546

547

548

549

550

551

552

553

554

555

## 556 References

- 557  
558  
559
1. Pozo K, Goda Y. Unraveling mechanisms of homeostatic synaptic plasticity. *Neuron* **66**, 337-351 (2010).
  - 560  
561  
562
  2. Turrigiano GG. The self-tuning neuron: synaptic scaling of excitatory synapses. *Cell* **135**, 422-435 (2008).
  - 563  
564  
565
  3. Shin SM, *et al.* GKAP orchestrates activity-dependent postsynaptic protein remodeling and homeostatic scaling. *Nat Neurosci* **15**, 1655-1666 (2012).
  - 566  
567  
568
  4. Sheng M, Hoogenraad CC. The postsynaptic architecture of excitatory synapses: a more quantitative view. *Annu Rev Biochem* **76**, 823-847 (2007).
  - 569  
570  
571
  5. Naisbitt S, *et al.* Interaction of the postsynaptic density-95/guanylate kinase domain-associated protein complex with a light chain of myosin-V and dynein. *J Neurosci* **20**, 4524-4534 (2000).
  - 572  
573  
574
  6. Kneussel M, Wagner W. Myosin motors at neuronal synapses: drivers of membrane transport and actin dynamics. *Nat Rev Neurosci* **14**, 233-247 (2013).
  - 575  
576  
577
  7. Kennedy MJ, Ehlers MD. Organelles and trafficking machinery for postsynaptic plasticity. *Annu Rev Neurosci* **29**, 325-362 (2006).
  - 578  
579
  8. Matus A. Actin-based plasticity in dendritic spines. *Science* **290**, 754-758 (2000).
  - 580  
581  
582
  9. Hu X, Viesselmann C, Nam S, Merriam E, Dent EW. Activity-dependent dynamic microtubule invasion of dendritic spines. *J Neurosci* **28**, 13094-13105 (2008).
  - 583  
584  
585
  10. McVicker DP, *et al.* Transport of a kinesin-cargo pair along microtubules into dendritic spines undergoing synaptic plasticity. *Nature communications* **7**, 12741 (2016).
  - 586  
587  
588
  11. Jaworski J, *et al.* Dynamic microtubules regulate dendritic spine morphology and synaptic plasticity. *Neuron* **61**, 85-100 (2009).
  - 589  
590  
591
  12. Asselin L, *et al.* Mutations in the KIF21B kinesin gene cause neurodevelopmental disorders through imbalanced canonical motor activity. *Nature communications* **11**, 2441 (2020).
  - 592  
593
  13. van Riel WE, *et al.* Kinesin-4 KIF21B is a potent microtubule pausing factor. *Elife* **6**, (2017).
  - 594  
595  
596
  14. Labonte D, Thies E, Kneussel M. The kinesin KIF21B participates in the cell surface delivery of gamma2 subunit-containing GABAA receptors. *European journal of cell biology* **93**, 338-346 (2014).
  - 597  
598  
599  
600
  15. Masucci EM, Relich PK, Lakadamyali M, Ostap EM, Holzbaur ELF. Microtubule dynamics influence the retrograde biased motility of kinesin-4 motor teams in neuronal dendrites. *Mol Biol Cell*, mbcE21100480 (2021).
  - 601  
602  
603
  16. Ghiretti AE, *et al.* Activity-Dependent Regulation of Distinct Transport and Cytoskeletal Remodeling Functions of the Dendritic Kinesin KIF21B. *Neuron* **92**, 857-872 (2016).
- 604

- 605 17. Bringmann H, Skiniotis G, Spilker A, Kandels-Lewis S, Vernos I, Surrey T. A kinesin-like motor  
606 inhibits microtubule dynamic instability. *Science* **303**, 1519-1522 (2004).
- 607  
608 18. He M, *et al.* The kinesin-4 protein Kif7 regulates mammalian Hedgehog signalling by organizing the  
609 cilium tip compartment. *Nat Cell Biol* **16**, 663-672 (2014).
- 610  
611 19. Marszalek JR, Weiner JA, Farlow SJ, Chun J, Goldstein LS. Novel dendritic kinesin sorting identified  
612 by different process targeting of two related kinesins: KIF21A and KIF21B. *J Cell Biol* **145**, 469-479  
613 (1999).
- 614  
615 20. Yamada K, *et al.* Heterozygous mutations of the kinesin KIF21A in congenital fibrosis of the  
616 extraocular muscles type 1 (CFEOM1). *Nat Genet* **35**, 318-321 (2003).
- 617  
618 21. Goris A, Boonen S, D'Hooghe M B, Dubois B. Replication of KIF21B as a susceptibility locus for  
619 multiple sclerosis. *Journal of medical genetics* **47**, 775-776 (2010).
- 620  
621 22. Kreft KL, *et al.* Abundant kif21b is associated with accelerated progression in neurodegenerative  
622 diseases. *Acta neuropathologica communications* **2**, 144 (2014).
- 623  
624 23. Muhia M, *et al.* The Kinesin KIF21B Regulates Microtubule Dynamics and Is Essential for Neuronal  
625 Morphology, Synapse Function, and Learning and Memory. *Cell Rep* **15**, 968-977 (2016).
- 626  
627 24. Morikawa M, Tanaka Y, Cho HS, Yoshihara M, Hirokawa N. The Molecular Motor KIF21B Mediates  
628 Synaptic Plasticity and Fear Extinction by Terminating Rac1 Activation. *Cell Rep* **23**, 3864-3877  
629 (2018).
- 630  
631 25. Sun ZG, Pan F, Shao JB, Yan QQ, Lu L, Zhang N. Kinesin superfamily protein 21B acts as an  
632 oncogene in non-small cell lung cancer. *Cancer Cell Int* **20**, 233 (2020).
- 633  
634 26. Hooikaas PJ, *et al.* Kinesin-4 KIF21B limits microtubule growth to allow rapid centrosome  
635 polarization in T cells. *Elife* **9**, (2020).
- 636  
637 27. Gromova KV, *et al.* Neurobeachin and the Kinesin KIF21B Are Critical for Endocytic Recycling of  
638 NMDA Receptors and Regulate Social Behavior. *Cell Rep* **23**, 2705-2717 (2018).
- 639  
640 28. Petralia RS, Sans N, Wang YX, Wenthold RJ. Ontogeny of postsynaptic density proteins at  
641 glutamatergic synapses. *Mol Cell Neurosci* **29**, 436-452 (2005).
- 642  
643 29. Correia SS, *et al.* Motor protein-dependent transport of AMPA receptors into spines during long-  
644 term potentiation. *Nat Neurosci* **11**, 457-466 (2008).
- 645  
646 30. Gramlich MW, Klyachko VA. Actin/Myosin-V- and Activity-Dependent Inter-synaptic Vesicle  
647 Exchange in Central Neurons. *Cell Rep* **18**, 2096-2104 (2017).
- 648  
649 31. Lee HK, Kameyama K, Huganir RL, Bear MF. NMDA induces long-term synaptic depression and  
650 dephosphorylation of the GluR1 subunit of AMPA receptors in hippocampus. *Neuron* **21**, 1151-1162  
651 (1998).
- 652  
653 32. Kumar A, Foster TC. Interaction of DHPG-LTD and synaptic-LTD at senescent CA3-CA1  
654 hippocampal synapses. *Hippocampus* **24**, 466-475 (2014).

- 655  
656 33. Matus A. Growth of dendritic spines: a continuing story. *Curr Opin Neurobiol* **15**, 67-72 (2005).
- 657  
658 34. Schliwa M. Action of cytochalasin D on cytoskeletal networks. *J Cell Biol* **92**, 79-91 (1982).
- 659  
660 35. Yong AJH, Tan HL, Zhu Q, Bygrave AM, Johnson RC, Huganir RL. Tyrosine phosphorylation of the  
661 AMPA receptor subunit GluA2 gates homeostatic synaptic plasticity. *Proc Natl Acad Sci U S A* **117**,  
662 4948-4958 (2020).
- 663  
664 36. Turrigiano G. Homeostatic synaptic plasticity: local and global mechanisms for stabilizing neuronal  
665 function. *Cold Spring Harb Perspect Biol* **4**, a005736 (2012).
- 666  
667 37. Siddoway B, Hou H, Xia H. Molecular mechanisms of homeostatic synaptic downscaling.  
668 *Neuropharmacology* **78**, 38-44 (2014).
- 669  
670 38. Wang G, Gilbert J, Man HY. AMPA receptor trafficking in homeostatic synaptic plasticity: functional  
671 molecules and signaling cascades. *Neural Plast* **2012**, 825364 (2012).
- 672  
673 39. Lu J, *et al.* Postsynaptic positioning of endocytic zones and AMPA receptor cycling by physical  
674 coupling of dynamin-3 to Homer. *Neuron* **55**, 874-889 (2007).
- 675  
676 40. Choquet D, Triller A. The dynamic synapse. *Neuron* **80**, 691-703 (2013).
- 677  
678 41. Kneussel M, Triller A, Choquet D. SnapShot: Receptor Dynamics at Plastic Synapses. *Cell* **157**,  
679 1738-1738 e1731 (2014).
- 680  
681 42. Wang Z, *et al.* Myosin Vb mobilizes recycling endosomes and AMPA receptors for postsynaptic  
682 plasticity. *Cell* **135**, 535-548 (2008).
- 683  
684 43. Hanley JG. Actin-dependent mechanisms in AMPA receptor trafficking. *Frontiers in cellular*  
685 *neuroscience* **8**, 381 (2014).
- 686  
687 44. Petrini EM, Lu J, Cognet L, Lounis B, Ehlers MD, Choquet D. Endocytic trafficking and recycling  
688 maintain a pool of mobile surface AMPA receptors required for synaptic potentiation. *Neuron* **63**,  
689 92-105 (2009).
- 690  
691 45. Kneussel M, Hausrat TJ. Postsynaptic Neurotransmitter Receptor Reserve Pools for Synaptic  
692 Potentiation. *Trends Neurosci* **39**, 170-182 (2016).
- 693  
694 46. Labonte D, *et al.* TRIM3 regulates the motility of the kinesin motor protein KIF21B. *PLoS One* **8**,  
695 e75603 (2013).
- 696  
697 47. Hung AY, Sung CC, Brito IL, Sheng M. Degradation of postsynaptic scaffold GKAP and regulation  
698 of dendritic spine morphology by the TRIM3 ubiquitin ligase in rat hippocampal neurons. *PLoS ONE*  
699 **5**, e9842 (2010).
- 700  
701 48. Yu HL, *et al.* Myosin X Interaction with KIF13B, a Crucial Pathway for Netrin-1-Induced Axonal  
702 Development. *J Neurosci* **40**, 9169-9185 (2020).
- 703

- 704 49. Feng J, *et al.* Depletion of kinesin-12, a myosin-IIB-interacting protein, promotes migration of cortical  
705 astrocytes. *J Cell Sci* **129**, 2438-2447 (2016).
- 706
- 707 50. Huang JD, *et al.* Direct interaction of microtubule- and actin-based transport motors. *Nature* **397**,  
708 267-270 (1999).
- 709
- 710 51. McIntosh BB, Holzbaaur EL, Ostap EM. Control of the initiation and termination of kinesin-1-driven  
711 transport by myosin-Ic and nonmuscle tropomyosin. *Curr Biol* **25**, 523-529 (2015).
- 712
- 713 52. Brachet A, *et al.* A kinesin 1-protrudin complex mediates AMPA receptor synaptic removal during  
714 long-term depression. *Cell Rep* **36**, 109499 (2021).
- 715
- 716 53. Preuss ML, Kovar DR, Lee YR, Staiger CJ, Delmer DP, Liu B. A plant-specific kinesin binds to actin  
717 microfilaments and interacts with cortical microtubules in cotton fibers. *Plant Physiol* **136**, 3945-  
718 3955 (2004).
- 719
- 720 54. Shen Z, Liu YC, Bibeau JP, Lemoi KP, Tuzel E, Vidali L. The kinesin-like proteins, KAC1/2, regulate  
721 actin dynamics underlying chloroplast light-avoidance in *Physcomitrella patens*. *J Integr Plant Biol*  
722 **57**, 106-119 (2015).
- 723
- 724 55. Borovac J, Bosch M, Okamoto K. Regulation of actin dynamics during structural plasticity of  
725 dendritic spines: Signaling messengers and actin-binding proteins. *Mol Cell Neurosci* **91**, 122-130  
726 (2018).
- 727
- 728 56. Horvath AA, Csernus EA, Lality S, Kaminski RM, Kamondi A. Inhibiting Epileptiform Activity in  
729 Cognitive Disorders: Possibilities for a Novel Therapeutic Approach. *Front Neurosci* **14**, 557416  
730 (2020).
- 731
- 732 57. Saito N, Okada Y, Noda Y, Kinoshita Y, Kondo S, Hirokawa N. KIFC2 is a novel neuron-specific C-  
733 terminal type kinesin superfamily motor for dendritic transport of multivesicular body-like organelles.  
734 *Neuron* **18**, 425-438 (1997).
- 735
- 736 58. Gee CE, Ohmert I, Wiegert JS, Oertner TG. Preparation of Slice Cultures from Rodent  
737 Hippocampus. *Cold Spring Harb Protoc* **2017**, (2017).
- 738
- 739
- 740
- 741
- 742
- 743
- 744
- 745
- 746
- 747



## 748 **Figure Legends**

749 **Figure 1. Kif21B is located at postsynaptic sites of dendritic spines. (A, B)** DIV14 cultured  
750 hippocampal neurons from KIF21B<sup>+/+</sup> (A) and KIF21B<sup>-/-</sup> (B) mice, co-labeled with F-actin-  
751 (green) or Kif21B- (magenta) specific antibodies. (C) Wildtype DIV14 cultured hippocampal  
752 neurons co-labeled with Kif21B- (magenta) or PSD-95- (green) specific antibodies. (D)  
753 Quantification of C (n=1,400 spines; N=5 exp.). Data are expressed as a percentage of control  
754 (total spine number) ± SEM. Statistical analyses: one-sample t-test; t=10,7 df=6, p=0,0001. (E)  
755 Western blot analysis of Kif21B in postsynaptic density fractions from mouse hippocampal  
756 tissue. Presynaptic synaptophysin is enriched in the supernatant (synaptosomes). KIF21B,  
757 GKAP1, and PSD-95 are detected in postsynaptic fractions (N=3). (F) Immunoelectron  
758 microscopy with diaminobenzidine (DAB) using hippocampal slices. Boxed region 1 and left:  
759 KIF21B decorates microtubules in KIF21B<sup>+/+</sup> (upper) but not KIF21B<sup>-/-</sup> neurons (KO control,  
760 lower). Boxed region 2 and right: KIF21B is detected at the PSD of individual spines. KIF21B-  
761 positive spine (pink, arrow), KIF21B-negative spine (green, crossed arrow). Scale bars: 3 μm  
762 (A-C), 500 nm (F).

763  
764 **Figure 2. The localization of KIF21B in spines is myosin Va and synaptic activity-**  
765 **dependent. (A)** Co-IP with myosin Va (MyoVa)-specific antibodies using adult mouse  
766 hippocampal lysate. Detection of MyoVa, KIF21B, and Myosin Vb (MyoVb). IgG: control (N=4).  
767 (B) Co-IP with Kif21B-specific antibodies using adult mouse hippocampal lysate. Detection of  
768 MyoVa, KIF21B, and MyoVb. IgG: control (N=4). (C) Schematic domain representation of  
769 fragments used in D. (D) Yeast-two-hybrid screen of KIF21B (prey) with MyoVa (bait) (N=2).  
770 (E) Quantification of KIF21B-positive spines co-labeled with F-actin and PSD95 following  
771 treatment with DMSO (control, n=22 cells, n=440 spines) or MyoVa inhibitor (n=35 cells, n=700  
772 spines); N=3 experiments, Student's t-test t=2,163 df=54, p=0,035. (F) Quantification of  
773 KIF21B-positive spines co-labeled with F-actin and PSD95 following treatment with DMSO  
774 (control, n=49 cells, n=980 spines), MyoVI inhibitor (n=31 cells, n=620 spines) or nocodazole  
775 (Noc, n=36 cells, n=720 spines), N=3 experiments, One-Way ANOVA Post-hoc Tukey,

776  $F=1,098$   $df=111$ .  $p=0,97$  (DMSO/MyoVI),  $p=0,68$  (DMSO/Noc),  $p=0,62$  (MyoVI/Noc).  
777 **(G)** Hippocampal neurons co-labeled with KIF21B- (green) and F-actin- (red) specific  
778 antibodies, following treatment with NMDA or DHPG. **(H)** Quantification of KIF21B-positive  
779 spines from G. Control:  $n=34$  cells,  $n=505$  spines. NMDA:  $n=30$  cells  $n=437$  spines. DHPG  
780  $n=26$  cells,  $n=354$  spines.  $N=4$  experiments, each. One-Way ANOVA, Post-hoc Tukey,  $F=11,5$   
781  $df=11$ ,  $p=0,01$  (Control/NMDA),  $p=0,004$  (Control/DHPG). **(I)** Co-IP with KIF21B-specific  
782 antibodies using acute hippocampal slices treated with NMDA. Detection of myosin Va  
783 (MyoVa).  $N=5$ . **(J)** Co-IP with KIF21B -specific antibodies using acute hippocampal slices  
784 treated with DHPG. Detection of myosin Va (MyoVa).  $N=5$ . **(K)** Quantification of **I** and **J** ( $N=5$ ).  
785 One-Way ANOVA, Post-hoc Dunnett  $F=11,1$   $df=14$ ,  $p=0,01$  (Control/NMDA),  $p=0,0057$   
786 (Control/DHPG). Data expressed as a percentage of control  $\pm$  SEM.  
787

788 **Figure 3. Kif21B depletion affects spines size and actin stability in spines.** **(A)** Dendritic  
789 protrusions from Dil-labeled KIF21B<sup>+/+</sup> and KIF21B<sup>-/-</sup> cultured hippocampal neurons at DIV14.  
790 **(B)** Quantification of spine head size per length of dendrites ( $n=600$  spines,  $N=3$  experiments).  
791 Mann-Whitney U Test,  $p=0,0001$ . **(C)** Dendritic protrusions from Dil-labeled KIF21B<sup>+/+</sup> and  
792 KIF21B<sup>-/-</sup> hippocampal slice cultures from CA1. 3D reconstruction (KIF21B<sup>+/+</sup>:  $n=73$ , KIF21B<sup>-/-</sup>:  
793  $n=181$  spines,  $N=3$  experiments). **(D)** Cumulative frequency (%) of spine head size ( $\mu\text{m}^3$ ) per  
794 dendrite length from C. **(E, F)** Localization of mRFP-Actin and KIF21B-GFP in COS7 cells  
795 treated with cytochalasin D (CytoD) for 1h,  $n=10$  cells, each. Right: Line scans depict  
796 overlapping fluorescent signal intensities (a.u.) over the lines in E (control) and F (CytoD). **(G)**  
797 Spine heads one day after transfection with GFP-actin using KIF21B<sup>+/+</sup> or KIF21B<sup>-/-</sup> cultured  
798 hippocampal neurons at DIV13. FRAP imaging of individual spines (circles) before and after  
799 bleaching is indicated. **(H)** FRAP analysis of GFP-actin fluorescence recovery. Recovery in  
800 KIF21B<sup>-/-</sup> spines (grey) does not reach the same level as in KIF21B<sup>+/+</sup> (black). Equal imaging  
801 and photobleaching conditions were used. **(I)** Average GFP-actin half-time recovery (s) of the  
802 dynamic F-actin pool is comparable in spines derived from KIF21B<sup>+/+</sup> and KIF21B<sup>-/-</sup> neurons.  
803 Mann-Whitney U Test,  $p=0,594$ . **(J)** The mobile F-actin fraction in FRAP recovery curves is

804 significantly decreased in KIF21B<sup>-/-</sup> spines, indicating increased actin stability. KIF21B<sup>+/+</sup> (n=99  
805 spines), KIF21B<sup>-/-</sup> (n=135 spines); N=3 experiments. One sample t-test, t=5, df=2, p=0,0375.  
806 Scale bar = 5s  $\mu$ m. Data are expressed  $\pm$  SEM.

807  
808 **Figure 4. KIF21B associates with GKAP and regulates homeostatic synaptic**  
809 **downscaling. (A)** Co-IP with GKAP-specific antibodies using adult mouse brain lysate.  
810 Detection of GKAP1, KIF21B, and KIF21A (negative control), N=3. **(B)** Hippocampal neurons  
811 at DIV14 co-labeled with GKAP- (red), KIF21B- (green) and F-actin- (blue) specific antibodies.  
812 Arrows depict colocalization, n=45 cells, N=3 experiments. **(C, D)** Hippocampal neurons at  
813 DIV14 co-labeled with a surface staining protocol using GluA2- (red) and F-Actin- (green)  
814 specific antibodies, following treatment with BIC or TTX over 48 hours. **(C)** KIF21B<sup>+/+</sup> wildtype  
815 neurons. **(D)** KIF21B<sup>-/-</sup> knockout neurons. Arrows depict colocalization. The thickness of  
816 arrows corresponds to values in E and F. **(E, F)** Quantification of cell surface GluA2  
817 fluorescence intensity in spines from C and D (n=30 cells; N $\geq$ 3 experiments, each. One-way  
818 ANOVA, Post-hoc Dunnett; for KIF21B<sup>+/+</sup> F=30 df=9 and KIF21B<sup>-/-</sup> F=3,7 df=11, (E) p=0,016  
819 (Untreated/BIC), p=0,004 (Untreated/TTX). (F) p=0,01 (Untreated/BIC). **(G)** Representative  
820 mEPSC recordings using KIF21B<sup>+/+</sup> or KIF21B<sup>-/-</sup> hippocampal slices treated with BIC over 48  
821 hours. **(H)** Quantification of mEPSC amplitudes shown in G, (pA), ANOVA, Post-hoc Tukey.  
822 p=0,0365 (Control (++)/BIC (+/+)), p=0,0406 Control (++)/Control (-/-), p=0,2466 (Control (-/-)  
823 )/BIC (-/-). n=12 slices (Control+/+), n=11 slices (BIC+/+), n=18 slices (Control-/-), n=11 slices  
824 (BIC-/-). Data are expressed  $\pm$  SEM.

825  
826 **Figure 5. KIF21B regulates GKAP and actin dynamics in spines following the induction**  
827 **of homeostatic synaptic plasticity. (A)** Hippocampal neurons at DIV14 co-labeled with  
828 GKAP- (red) and F-Actin- (green) specific antibodies, following treatment with DMSO (control)  
829 or BIC over 48 hours. **(B)** Quantification of fluorescent intensity (%) of GKAP1 in F-actin-  
830 positive spines in A (n= 120 cells, n=8 experiments). One sample T-test, t=3,1 df=7, p=0,0169.  
831 Data are expressed  $\pm$  SEM. **(C)** Hippocampal neurons at DIV14 co-labeled with KIF21B- (red)  
832 and F-Actin- (green) specific antibodies, following treatment with DMSO (control) or BIC over

833 48 hours. **(D)** Quantification of fluorescent intensity (%) of KIF21B in F-actin-positive spines in  
834 C (n=75 cells, n=5 experiments). One sample T-test,  $t=2.86$   $df=4$ ,  $p=0,045$ . Data are expressed  
835  $\pm$  SEM. **(E, G)** Hippocampal neurons at DIV14 derived from KIF21B<sup>+/+</sup> (E) or KIF21B<sup>-/-</sup> (G), co-  
836 labeled with GKAP- (red) and F-Actin- (green) specific antibodies. Neurons were treated with  
837 either DMSO (control) or BIC over 48. **(F)** Quantification of GKAP fluorescence intensity from  
838 E and G (n=1,110 spines for each condition, N=4 experiments). One-way ANOVA, Post-hoc  
839 Bonferroni;  $F=23,8$   $df=4406$ ,  $p=0,0001$  (Control (+/+)/BIC (+/+)),  $p=0,534$  (Control (+/+)/  
840 Control (-/-)),  $p=0,1966$  (Control (-/-)/BIC (-/-)). Data are expressed as individual data points.  
841 **(H)** FRAP analysis of GFP-actin recovery using wildtype (KIF21B<sup>+/+</sup>) hippocampal neurons at  
842 DIV 13 treated with DMSO (control) or BIC over 48h. **(I)** FRAP analysis of GFP-actin recovery  
843 using knockout (KIF21B<sup>-/-</sup>) hippocampal neurons at DIV 13 treated with DMSO (control) or BIC  
844 over 48h. **(J)** The average GFP-actin half-time recovery (s) of the dynamic F-actin pool in  
845 spines is significantly increased in KIF21B<sup>+/+</sup> neurons, following treatment with BIC, but  
846 remains unchanged in KIF21B<sup>-/-</sup> neurons. One-way ANOVA, Post-hoc Tukey  $F=25,9$   $df=14$ ,  
847  $p=0,001$  (Control (+/+)/BIC (+/+)),  $p=0,56$  (Control (+/+)/ Control (-/-)),  $p=0,0008$  (BIC (+/+)/  
848 BIC (-/-)),  $p=0,26$  (Control (-/-)/ BIC (-/-)). **(K)** The mobile actin fraction measured from FRAP  
849 curves of individual spines is by trend slightly decreased in KIF21B<sup>+/+</sup> spines after treatment  
850 with BIC but remains unchanged for KIF21B<sup>-/-</sup> spines. One-way ANOVA,  $p=0,05$  (Control  
851 (+/+)/BIC (+/+)),  $p=0,0128$  (Control (+/+)/ Control (-/-)),  $p=0,844$  (Control (-/-)/ BIC (-/-)). **(J, K)**  
852 KIF21B<sup>+/+</sup> DMSO (n=55 spines)  $N\geq 4$  experiments, KIF21B<sup>+/+</sup> BIC (n=69 spines)  $N\geq 4$   
853 experiments, KIF21B<sup>-/-</sup> DMSO (n=80 spines)  $N\geq 3$  experiments, KIF21B<sup>-/-</sup> BIC (n=59 spines)  
854  $N\geq 3$  experiments. One-way ANOVA, Post-hoc Tukey,  $F=3,1$   $df=16$ . Scale bars:10  $\mu\text{m}$  (A, C),  
855 5  $\mu\text{m}$  (E, G).

856  
857

858

859

860

861

Figure 1

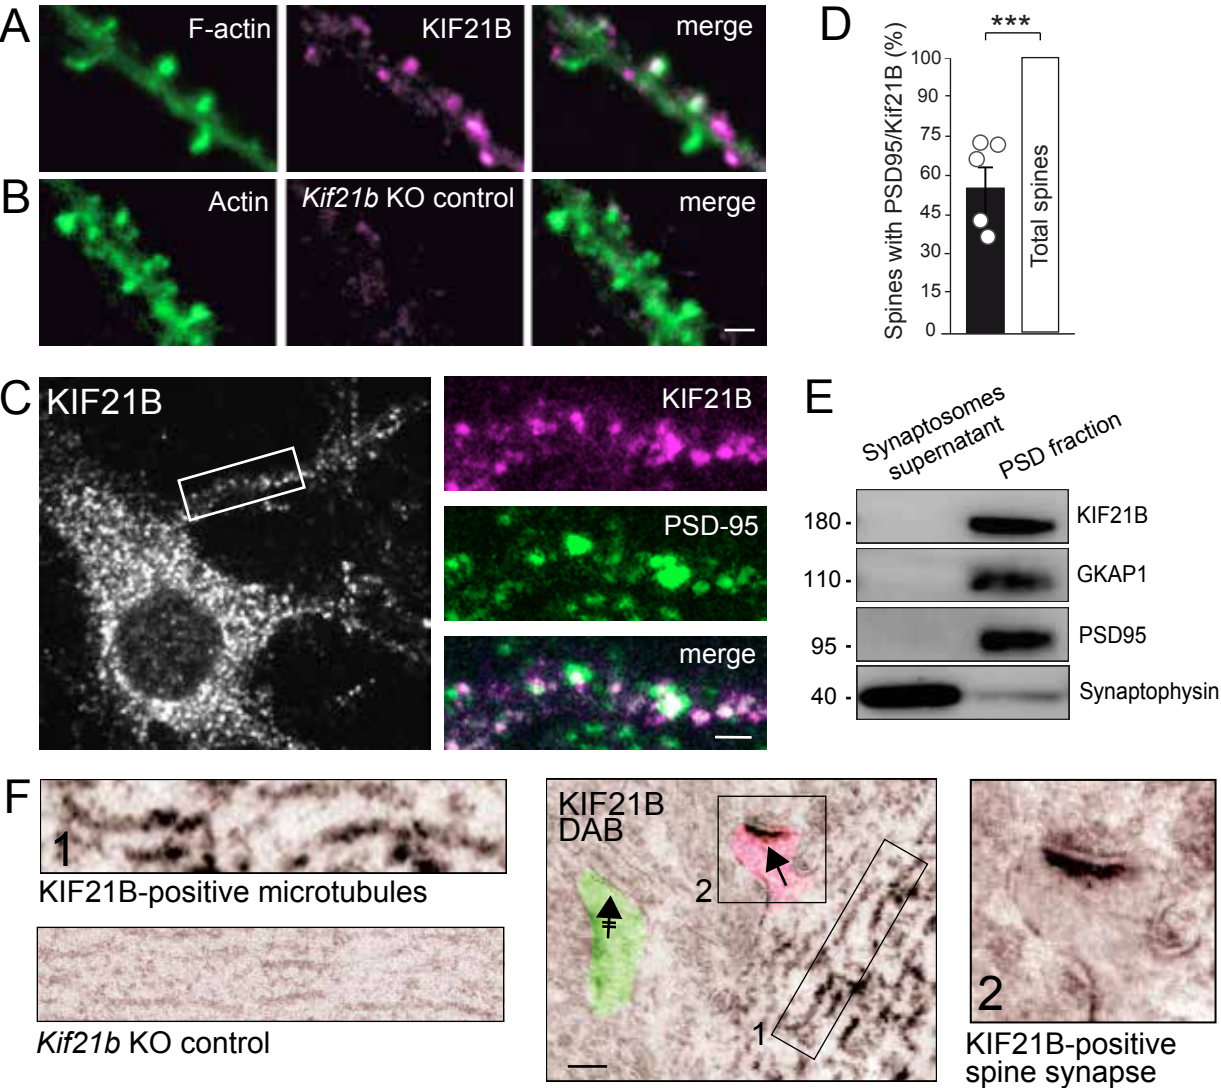

Figure 2

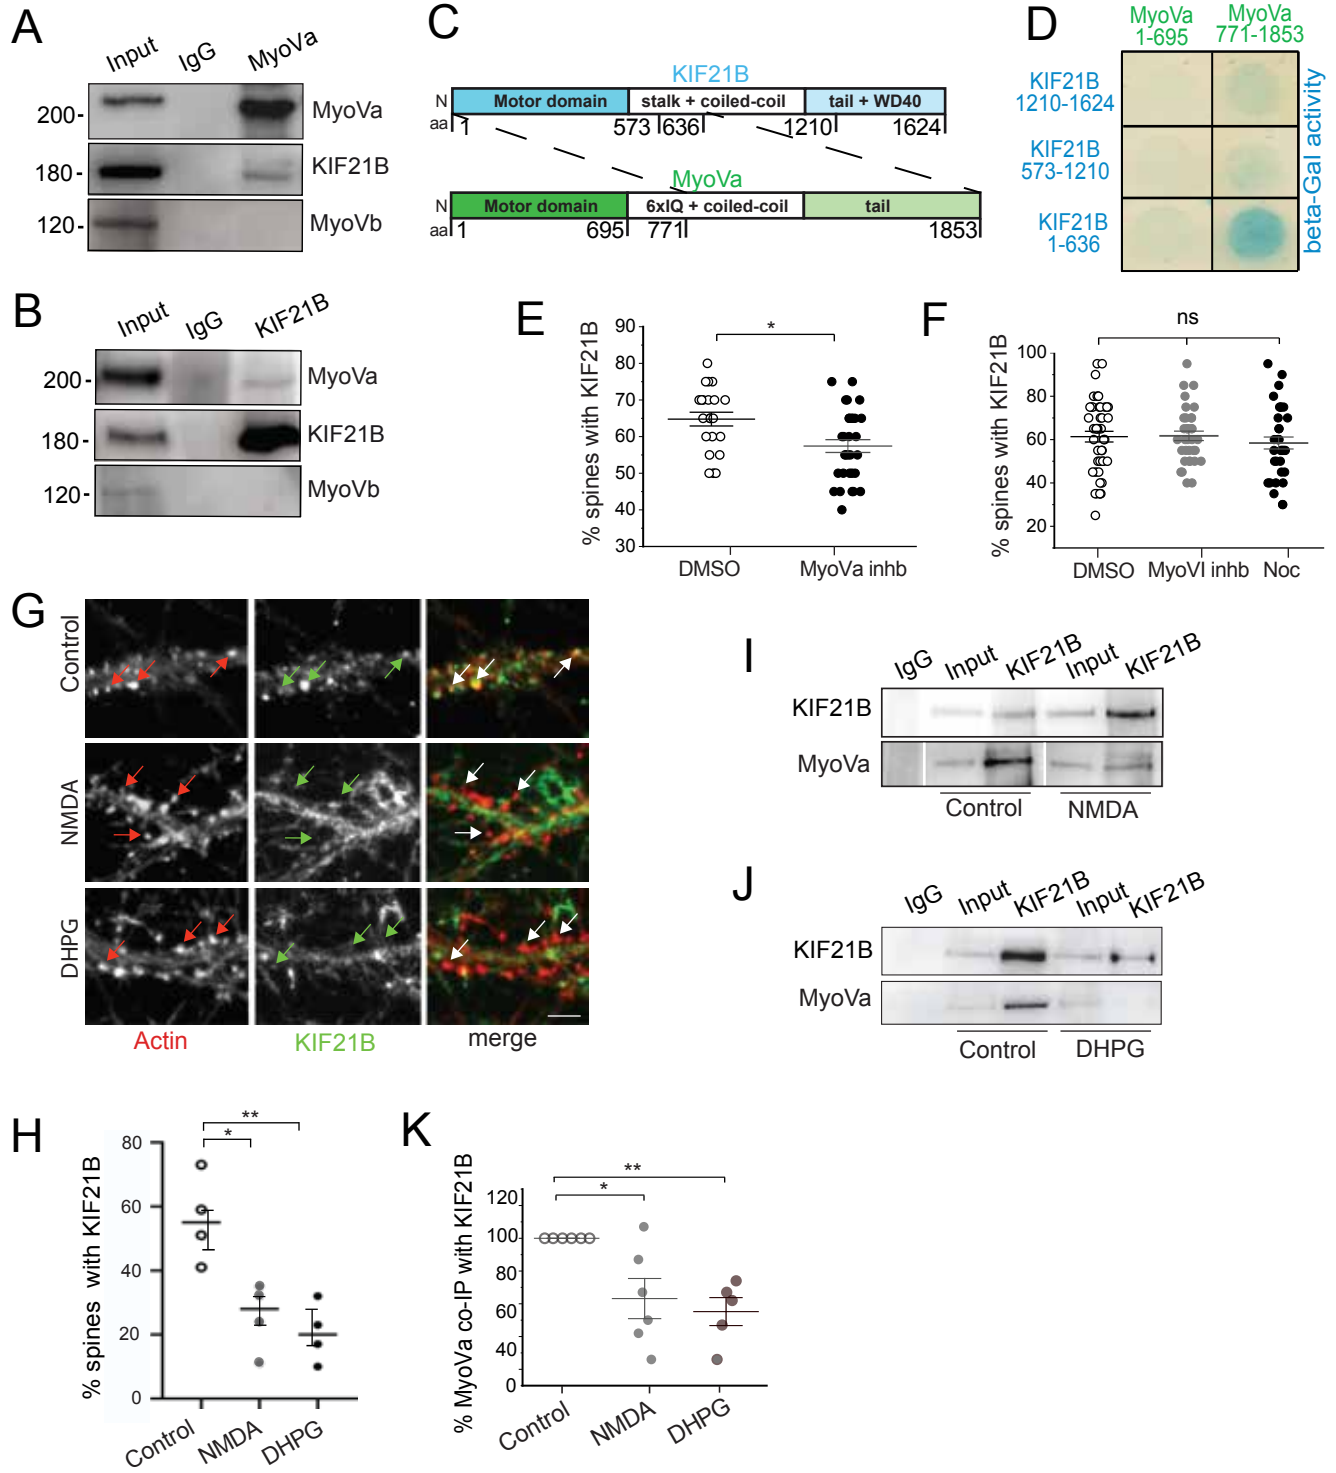

Figure 3

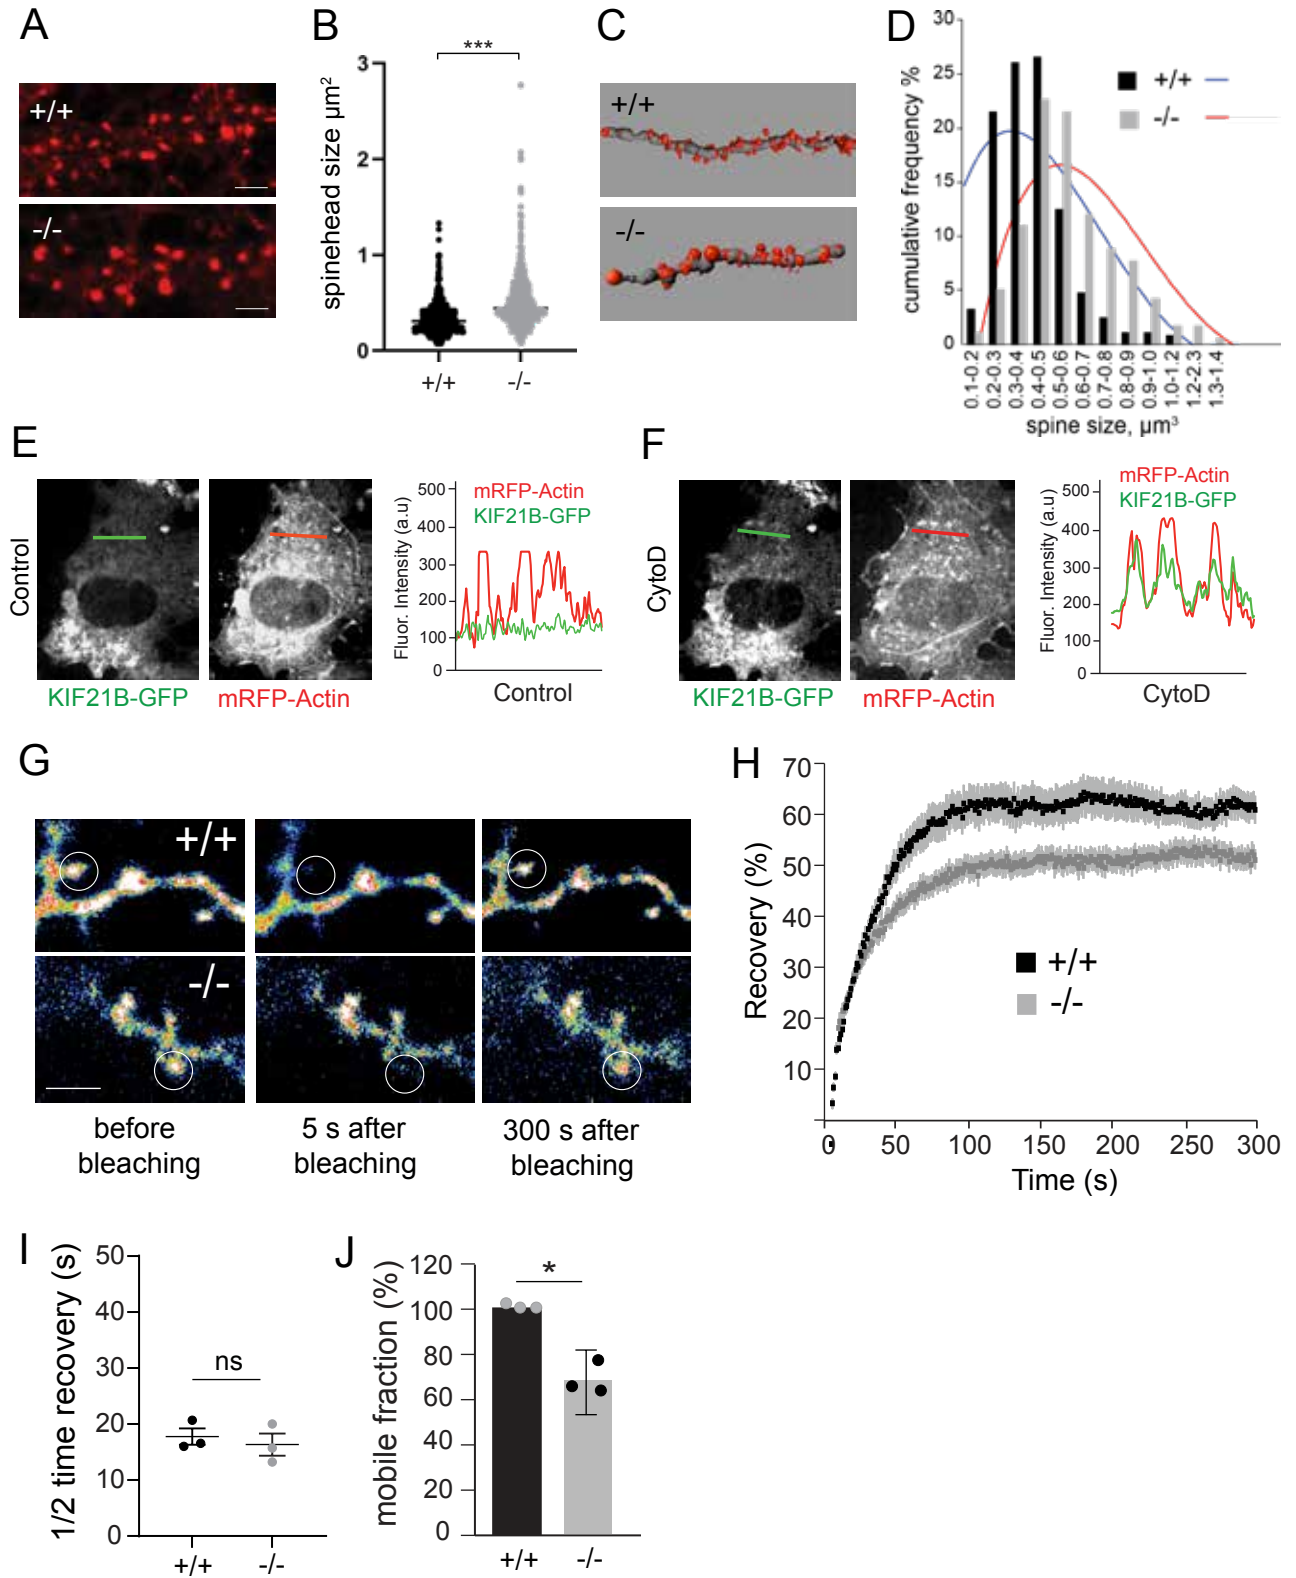

Figure 4

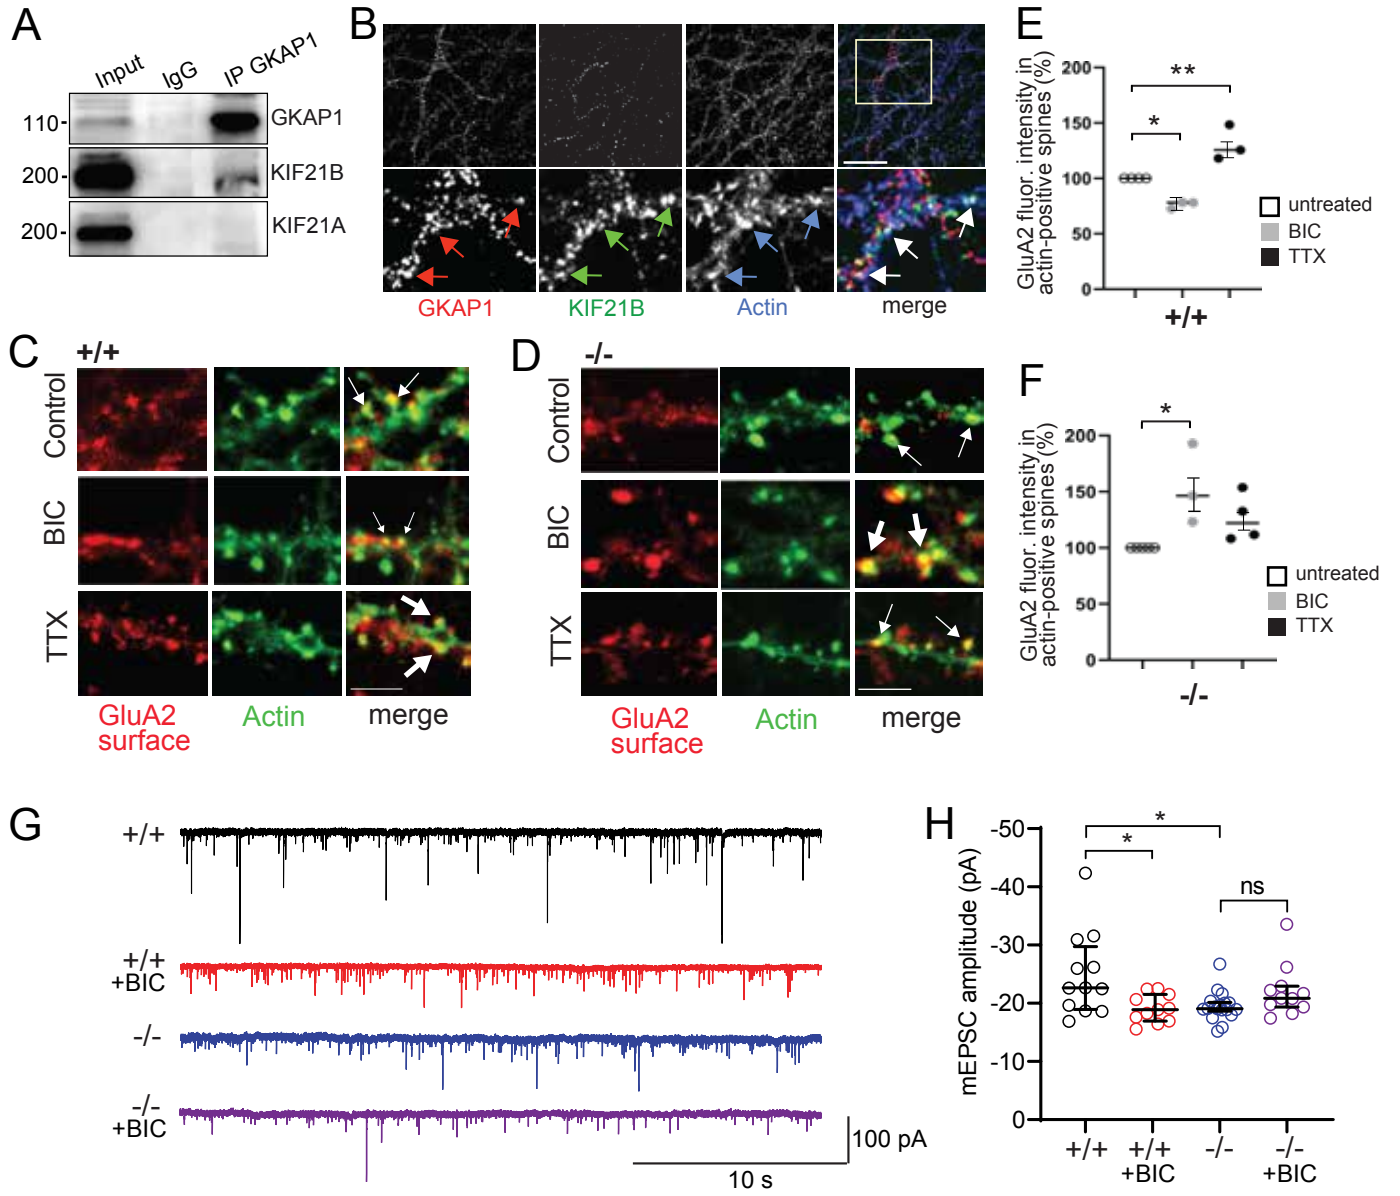



Figure 5

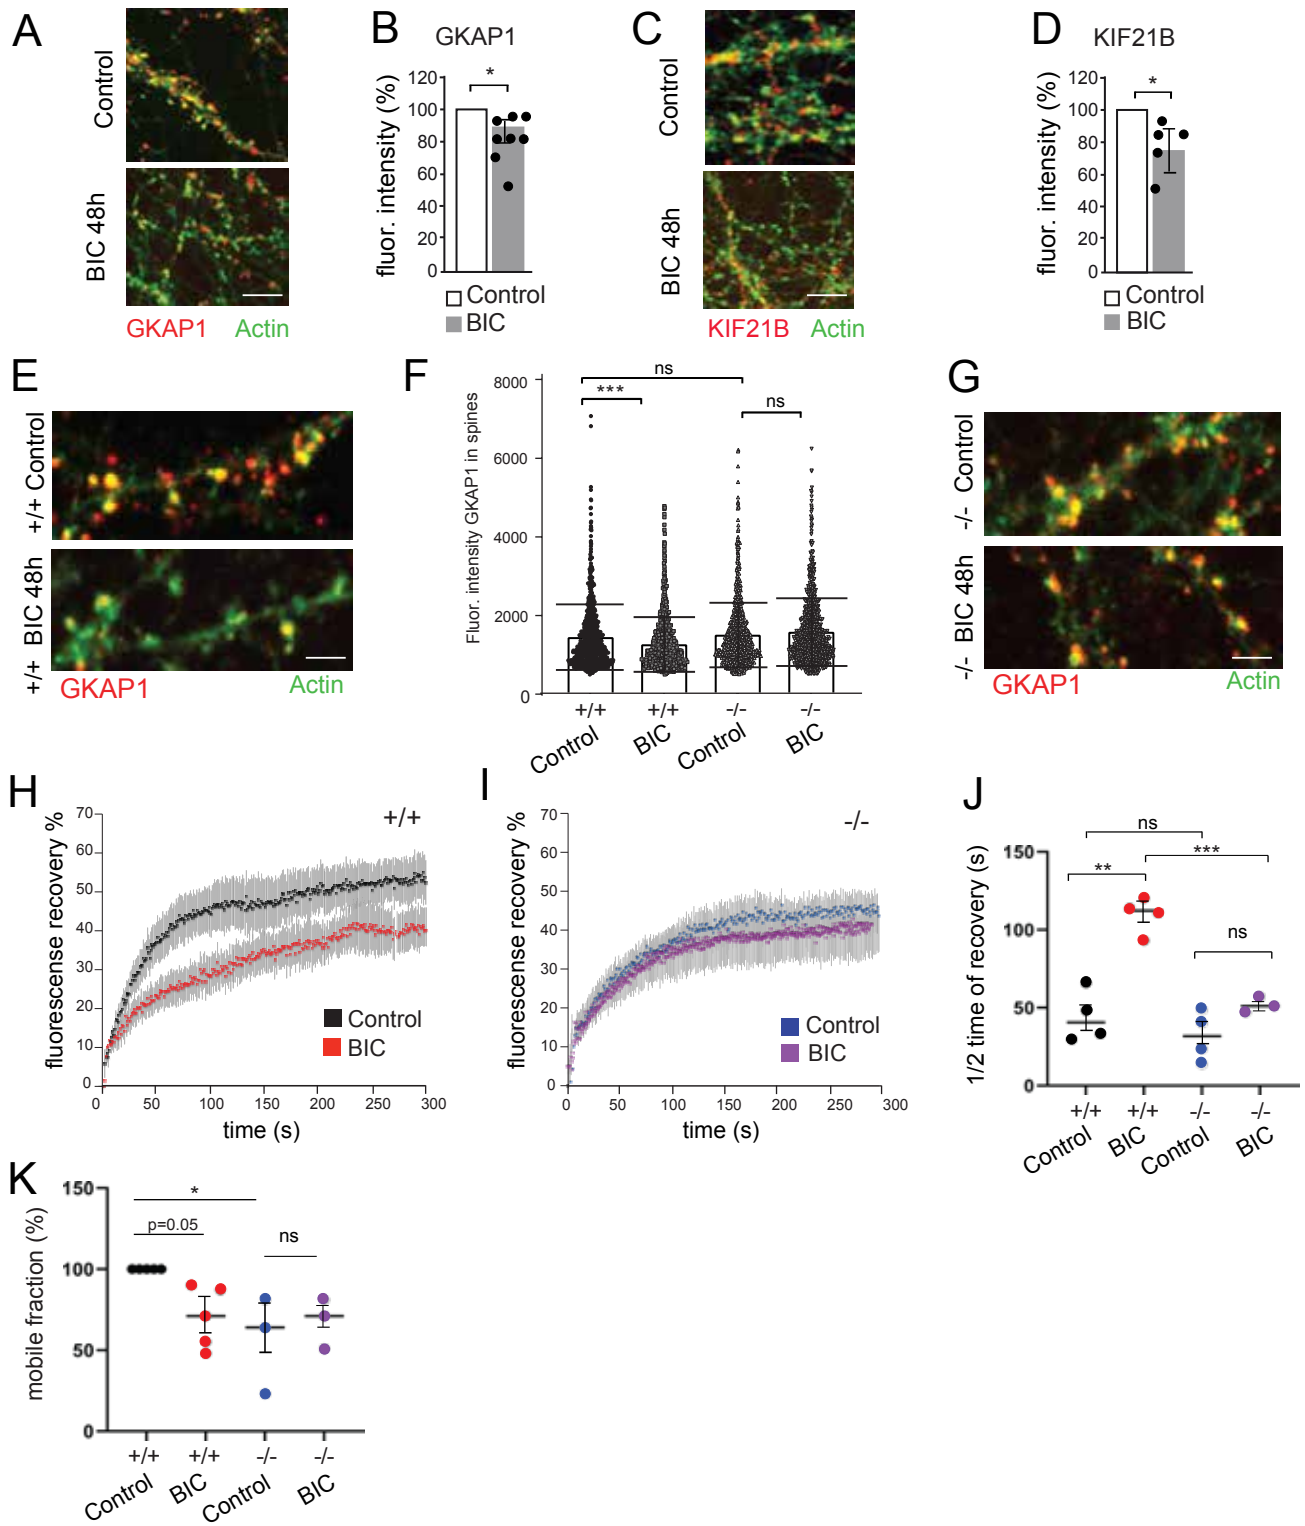

## Supplemental Information

### **KIF21B binds Myosin Va for Spine Entry and regulates Actin Dynamics to control Homeostatic Synaptic Downscaling**

**Kira V. Gromova<sup>1,2</sup>, Edda Thies<sup>1</sup>, Céline D. Dürst<sup>3</sup>, Daniele Stajano<sup>1</sup>, Michaela Schweizer<sup>4</sup>, Marina Mikhaylova<sup>5</sup>, Christine E. Gee<sup>2</sup>, Matthias Kneussel<sup>1,2</sup>**

<sup>1</sup>Department of Molecular Neurogenetics, Center for Molecular Neurobiology, ZMNH, University Medical Center Hamburg-Eppendorf, Hamburg, Germany

<sup>3</sup>Department of Synaptic Physiology, Center for Molecular Neurobiology, ZMNH, University Medical Center Hamburg-Eppendorf, Hamburg, Germany

<sup>4</sup>Core Facility Morphology, Center for Molecular Neurobiology, ZMNH, University Medical Center Hamburg-Eppendorf, Hamburg, Germany

<sup>5</sup>RG Optobiology, Institute of Biology, Humboldt Universität zu Berlin, Berlin, Germany

## Figure S1

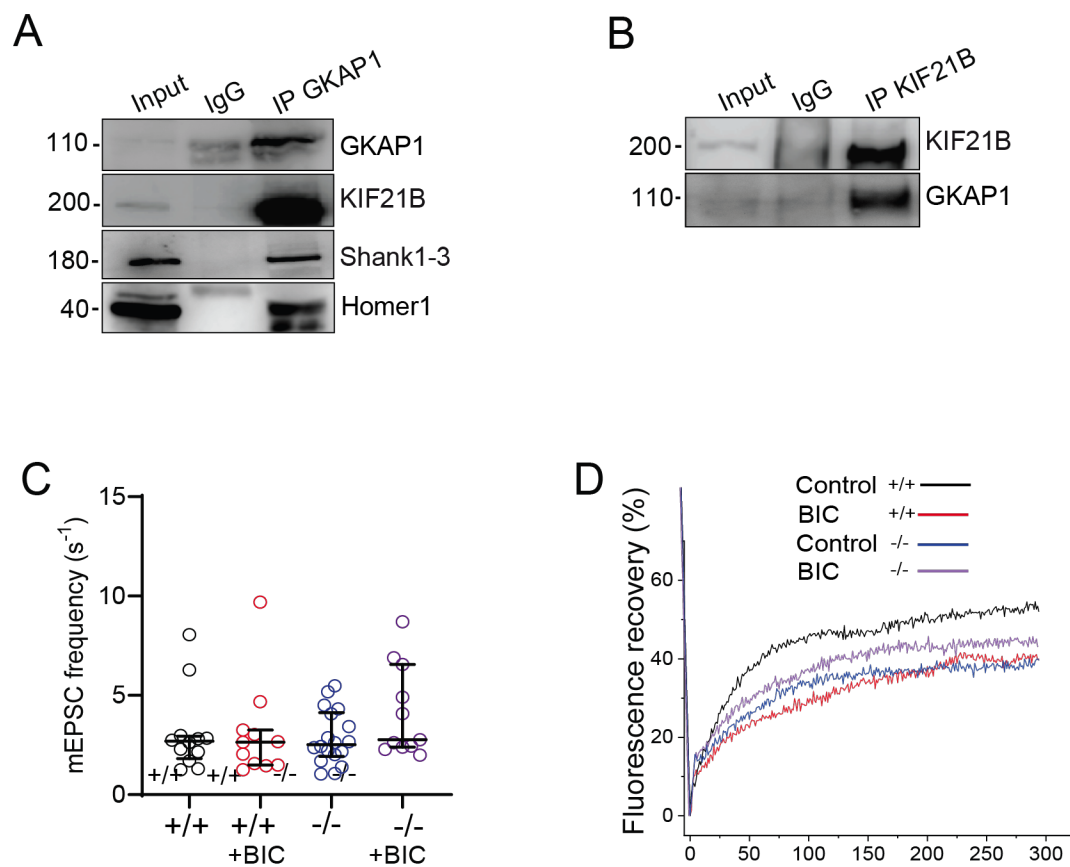

**Figure S1. Supplemental Figure related to Figures 4 and 5.** (A) Co-IP with GKAP1-specific antibodies using adult mouse brain lysate. Detection of GKAP1, KIF21B, Shank 1-3(positive control), Homer-1 (positive control). N=3. (B) Co-IP with KIF21B-specific antibodies using adult mouse brain lysate. Detection of GKAP1, N=3. (C) Quantification of mEPSC frequency (n=11, 12, 18, 11) ANOVA, Post-hoc Tukey.  $p=0,4672$  (D) FRAP analysis of GFP-actin recovery in spines of KIF21B<sup>+/+</sup> or KIF21B<sup>-/-</sup> neurons. Merged curves of Figure 5H and 5I.

## Movie S1

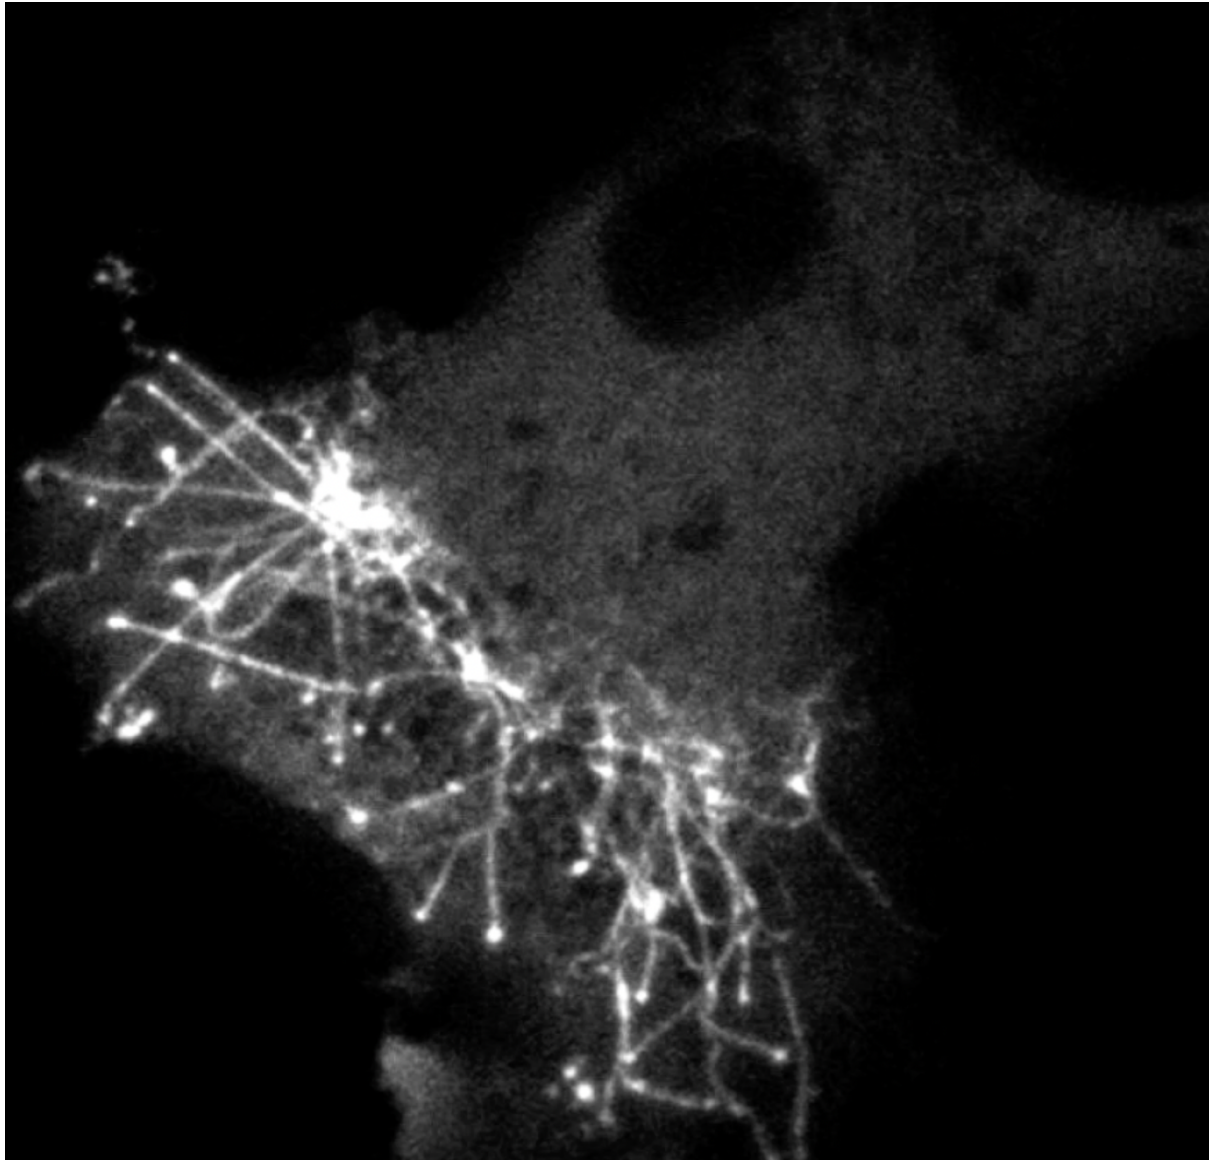

**Still image of supplemental movie S1.** Mobility of KIF2B-GFP particles in COS7 cells. Image acquisition intervals: 2 s over 3 min. The movie plays at 15 frames per second.

## Movie S2

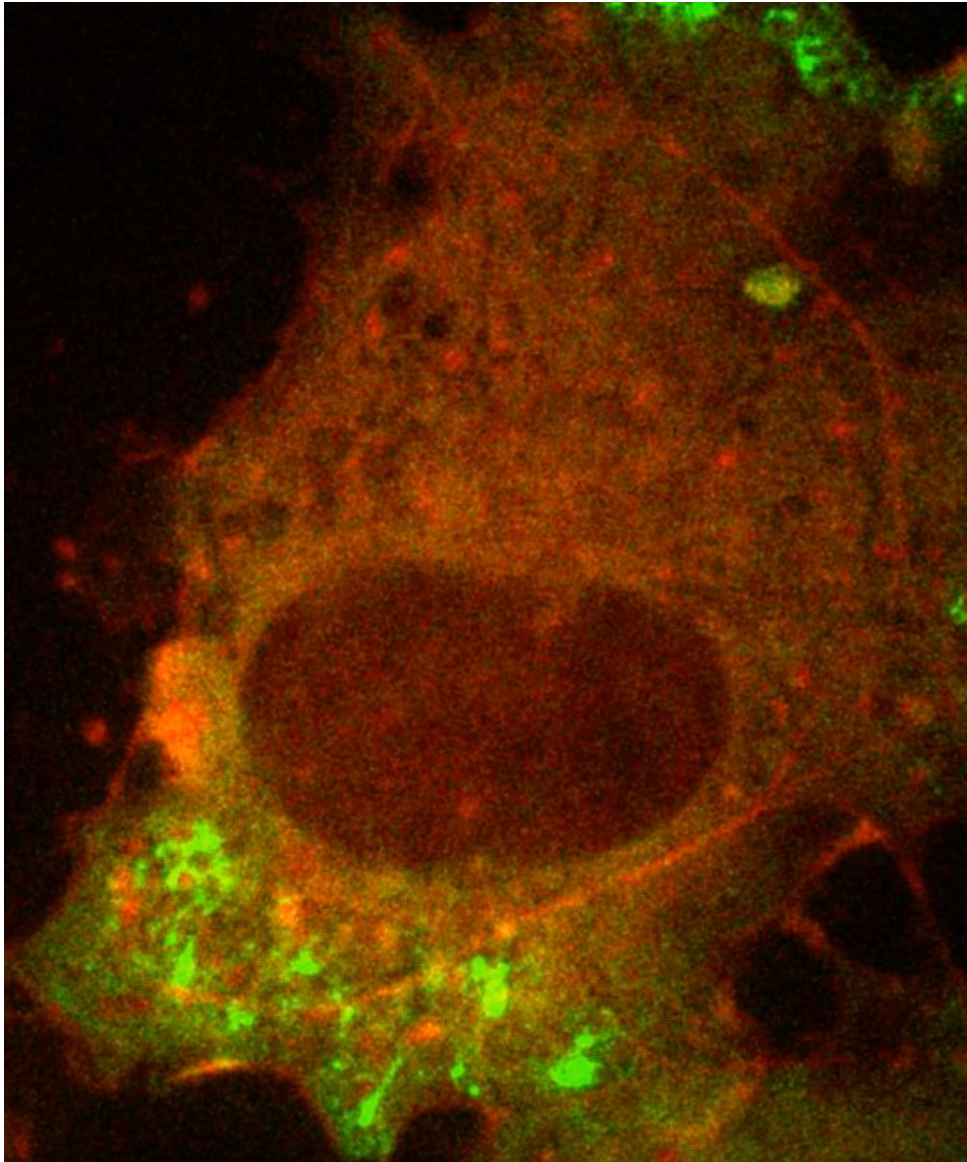

**Still image of supplemental movie S2.** Mobility of KIF2B-GFP and mRFP-actin in COS7 cells directly after cytochalasin D (CytoD) application. Image acquisition intervals: 2 s over 3 min. The movie plays at 15 frames per second.
